# Supplementary material for: Up-regulation of hypoxia-inducible factor antisense as a novel approach to treat ovarian cancer
Source: PubMed Central journal article supplement (PMC7295058; doi:10.7150/thno.41792), 2020-05-25
Supplement: thnov10p6959s1.pdf [file thnov10p6959s1.pdf]

# Up-regulation of hypoxia-inducible factor antisense as a novel approach to treat ovarian cancer

Tiangong Lu<sup>1,ϕ</sup>, Jianming Tang<sup>1,2,ϕ</sup>, Binita Shrestha<sup>1</sup>, Blake R. Heath<sup>3</sup>, Li Hong<sup>2</sup>, Yu L. Lei<sup>3</sup>, Mats Ljungman<sup>4</sup>, and Nouri Neamati<sup>1</sup>✉

1. Department of Medicinal Chemistry, College of Pharmacy, Rogel Cancer Center, University of Michigan, Ann Arbor, MI 48109-2800, USA
2. Department of Gynecology and Obstetrics, Renmin Hospital of Wuhan University, 238 Jiefang Road, Wuhan, Hubei province, 430060, P.R. China
3. Departments of Periodontics and Oral Medicine and Otolaryngology - Head and Neck Surgery, Rogel Cancer Center, University of Michigan, Ann Arbor, MI 48109-2800, USA
4. Department of Radiation Oncology, University of Michigan Medical School, Rogel Cancer Center and Department of Environmental Health Sciences, School of Public Health, University of Michigan, Ann Arbor, MI 48109-2800, USA

✉ Corresponding author: N.N. E-mail: [neamati@umich.edu](mailto:neamati@umich.edu); Phone: 734-647-2732

ϕ Contributed equally to this work

## Supplementary figure titles and legends

**Figure S1: SC144 induces hypoxia signaling.** (A) Bar plot for fold change of relative transcription level of 154 and 184 genes in hallmark GLYCOLYSIS and MTORC1-SIGNALING gene sets from SC144 treatment compared to control in OVCAR-8 cells. (B) Enrichment plots of hallmark TNFA\_SIGNALING\_VIA\_NFKB, INFLAMMATORY\_RESPONSE, IL6\_JAK\_STAT3\_SIGNALING, IL2\_STAT5\_SIGNALING, COMPLEMENT, REACTIVE\_OXIGEN\_SPECIES\_PATHWAY and KRAS\_SIGNALING\_UP gene sets over-represented most significantly out of the pre-ranked gene lists from SC144 treatment in OVCAR-8 cells.

**Figure S2: Statistical analysis of hypoxia-related mediators upregulated by SC144.** OVCAR-8 cells were treated with 0.6 and 1.2  $\mu\text{M}$  SC144 for 2 h, DMSO was used as vehicle control. Compared with control group:  $*P < 0.05$ ,  $**P < 0.01$ .

**Figure S3: Genes and perturbations positively related to SC144 treatment compared to control in OVCAR-8 cells.** Bru-seq data was analysed by Connectivity Map L1000 Platform.

**Figure S4: Genes and perturbations negatively related to SC144 treatment compared to control in OVCAR-8 cells.** Bru-seq data was analysed by Connectivity Map L1000 Platform.

**Figure S5: SC144 induces hypoxic stress, transiently up-regulation of HIF-1 $\alpha$  and activation of NDRG1 signaling.** (A) SC144 induces hypoxic stress. OVCAR-8 cells were treated with 1.2  $\mu\text{M}$  SC144 for 2, 6, 12, 24 and 48 h, DMSO was used as vehicle control, DFO (100  $\mu\text{M}$ , 24 h) was used as positive control. After treatments, cells were incubated with hypoxia green reagent (Thermo Fisher Scientific, H20035) for 2 h, then cells were analysed using flow cytometry according to manufacturer's instructions. SC144 treatment significantly increases the hypoxia levels in different time points. (B) SC144 induces up-regulation of HIF-1 $\alpha$  in a dose dependent manner as early as 2h. OVCAR-8 cells were treated with 1.2 and 2.4  $\mu\text{M}$  SC144 for 2h. (C) SC144 induces transiently up-regulation of HIF-1 $\alpha$  and up-regulation of NDRG1. ID 8 and LN-CaP cells were treated with 1.2  $\mu\text{M}$  SC144 for 2, 6, 12, 24 and 48 h, DMSO was used as vehicle control. SC144 transiently increased the protein levels of ID8 and LN-CaP cells in 2 and 6 h's treatments, and then decreased in 12, 24 and 48 h's treatments. SC144 significantly increases the protein expression levels of NDRG1 on LN-CaP cells in an time-dependent manner. (D) Proteasome inhibition has no effect on the decrease of HIF-1 $\alpha$  protein levels. OVCAR-8 and SK-OV-3 cells were treated with 10  $\mu\text{M}$  MG-132 for 1, 2 and 4 h, then followed by SC144 treatment (1.2  $\mu\text{M}$ , 24 h). DMSO was used as vehicle control and 2

h's SC144 treatment was used as positive control. Proteasome inhibition has no effect on SC144 induced decrease of HIF-1 $\alpha$  protein levels in 24 h's treatment.

**Figure S6: SC144 modulates NDRG1 and downstream signaling.** (A) Protein expression of NDRG-1 and its select downstream signalling genes affected by SC144. Compared with DMSO control group: \* $P < 0.05$ , \*\* $P < 0.01$ . (B) SC144 decreases the protein expression levels of NDRG1 downstream factors, EGFR, Met and tissue factor (TF), in a time-dependent manner. OVCAR-8 and SK-OV-3 cells were treated with 1.2  $\mu$ M SC144 for 2, 6, 12, 24 and 48 h, DMSO was used as vehicle control..

**Figure S7: SC144 sensitizes ovarian cancer cells to chemotherapeutic agents.** ID 8 cells were treated with the combinations of SC144 and chemotherapeutic agents including olaparib, carboplatin and cisplatin for 7 d, then, colonies were stained and imaged. Red lines indicate wells with significant synergistic effect from the combination treatment. Images are representative of 3 independent experiments.

**Figure S8: SC144 exhibits metal chelation ability on iron, copper and zinc.** The antiproliferative effects of SC144, CPX and DFO were rescued by Fe, Cu and Zn in a dose-dependent manner. SK-OV-3 cells were treated with SC144, CPX and DFO. FeCl<sub>3</sub>, CuSO<sub>4</sub> and ZnCl<sub>2</sub> were added together with the compounds at indicated concentrations Cell viabilities were determined using colony formation assays.

**Figure S9: SC144 induces comparable cellular transcriptional profiling in both OVCAR-8 and LN CaP cells.** (A) Common upregulated and downregulated genes by SC144 treatment between OVCAR-8 and LN CaP cells. Genes with a fold change of  $\pm 2$  are considered in the analysis. (B) Common upregulated gene sets by SC144 treatment between OVCAR-8 and LN CaP cells.

**Figure S10: Overlapped genes among top 25 upregulated genes by SC144 treatment between OVCAR-8 and LN CaP cells.** Fold changes of the 9 overlapped genes from each cell lines are listed in the table. The gene map is from RefSeq Genes (UCSC genome browser, <http://genome.ucsc.edu/>).

**Figure S11: Common compounds positively related to SC144 treatment in OVCAR-8 and LN CaP cells.** Bru-seq data was analysed by Connectivity Map L1000 Platform. The compounds analysis was used a filter of median score >90. >edian scores of the 20 overlapped compounds from each cell lines are listed in the table.

Supplementary Figure S1

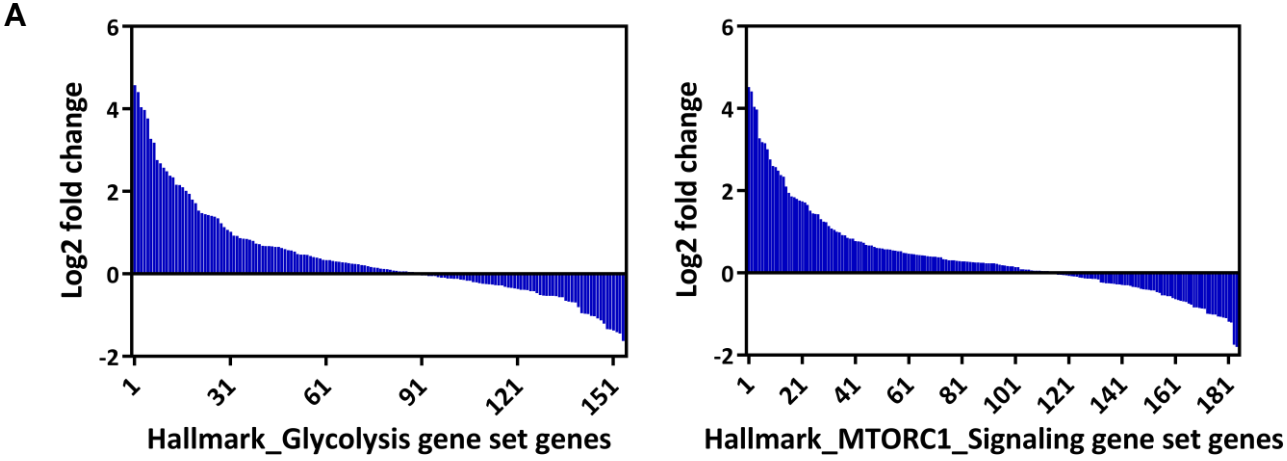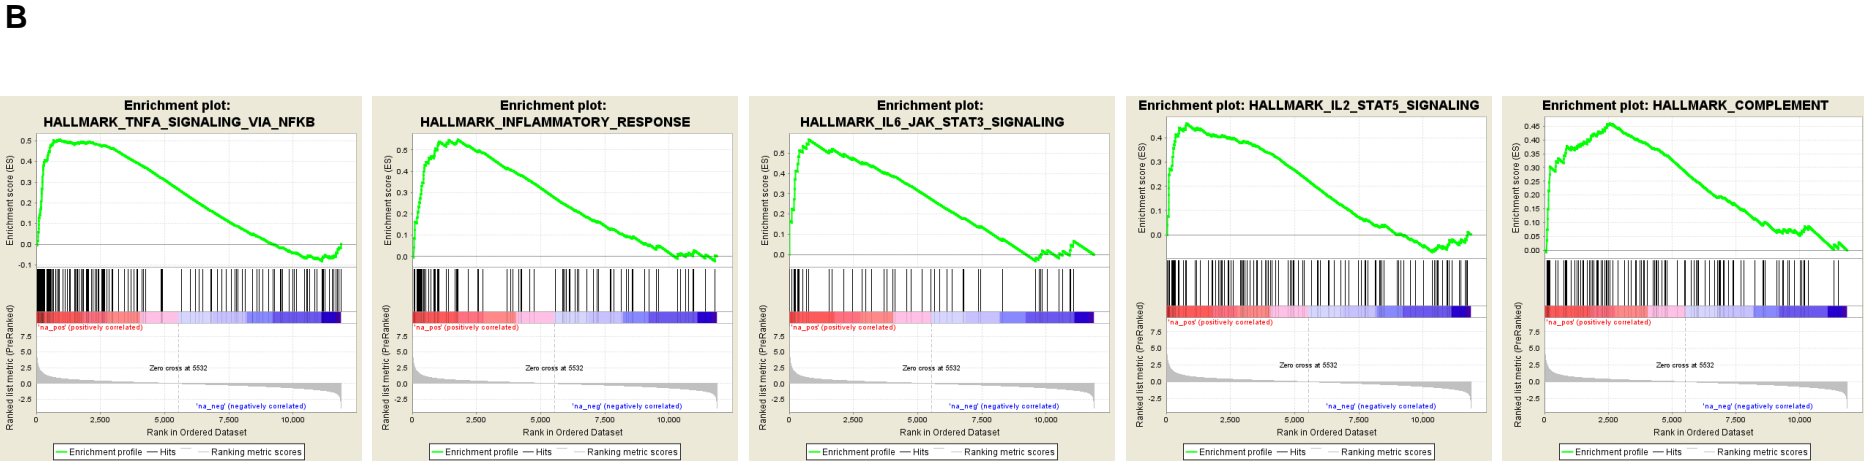

Supplementary Figure S2

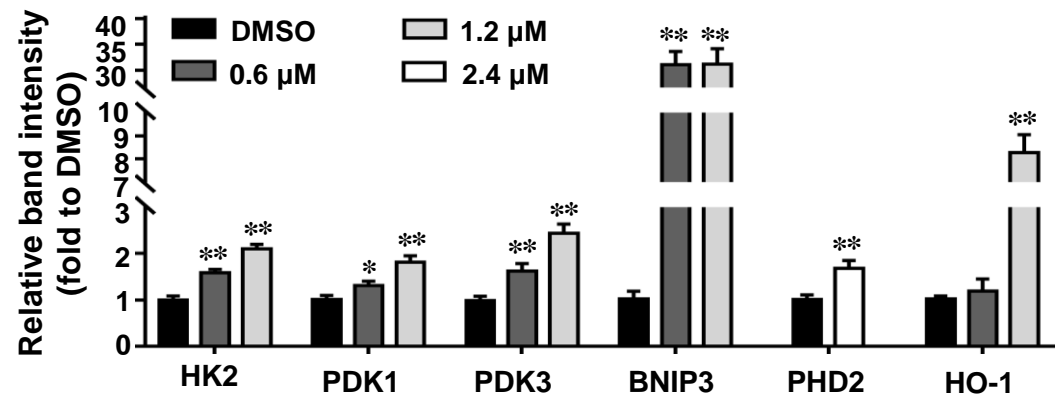

# Supplementary Figure S3

## cMap\_gene and perturbation\_OVCAR-8\_Up

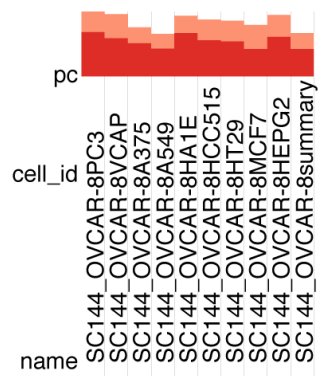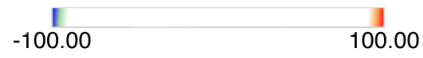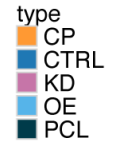

| pc_selection | #  | median_score | type | name                            | description                                                     |
|--------------|----|--------------|------|---------------------------------|-----------------------------------------------------------------|
|              | 1  | 99.93        | CP   | TW-37                           | BCL inhibitor, MCL1 inhibitor                                   |
|              | 2  | 99.93        | PCL  | HIF activator                   |                                                                 |
|              | 3  | 99.90        | CP   | hinokitiol                      | tyrosinase inhibitor                                            |
|              | 4  | 99.90        | CP   | MST-312                         | telomerase inhibitor                                            |
|              | 5  | 99.89        | CP   | VU-0418947-2                    | hypoxia inducible factor activator                              |
|              | 6  | 99.88        | CP   | VU-0418946-1                    | hypoxia inducible factor activator                              |
|              | 7  | 99.88        | CP   | SA-1478088                      | metalloproteinase inhibitor                                     |
|              | 8  | 99.88        | CP   | UK-356618                       | metalloproteinase inhibitor                                     |
|              | 9  | 99.87        | CP   | PAC-1                           | caspase activator                                               |
|              | 10 | 99.87        | CP   | BRD-K73610817                   | apoptosis protein inhibitor                                     |
|              | 11 | 99.84        | CP   | PAC-1                           | caspase activator                                               |
|              | 12 | 99.71        | CP   | WAY-170523                      | metalloproteinase inhibitor                                     |
|              | 13 | 99.69        | CP   | AG-592                          | tyrosine kinase inhibitor                                       |
|              | 14 | 99.63        | KD   | RXRA                            | Retinoid X receptors, retinoid X receptor, alpha                |
|              | 15 | 99.60        | CP   | MLN-4924                        | nedd activating enzyme inhibitor                                |
|              | 16 | 99.51        | CP   | NSC-632839                      | ubiquitin hydrolase inhibitor, ubiquitin isopeptidase inhibitor |
|              | 17 | 99.42        | CP   | NSC-632839                      | ubiquitin hydrolase inhibitor, ubiquitin isopeptidase inhibitor |
|              | 18 | 99.37        | PCL  | Proteasome inhibitor            |                                                                 |
|              | 19 | 99.28        | CP   | phorbol-12-myristate-13-acetate | PKC activator, CD antagonist                                    |
|              | 20 | 99.24        | CP   | thiostrepton                    | downregulates FOXM1 expression. FOXM1 expression inh            |

# Supplementary Figure S4

## cMap\_gene and perturbation\_OVCAR-8\_Down

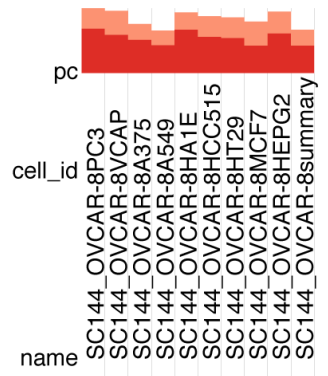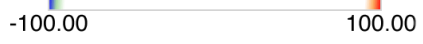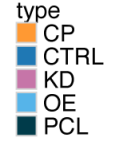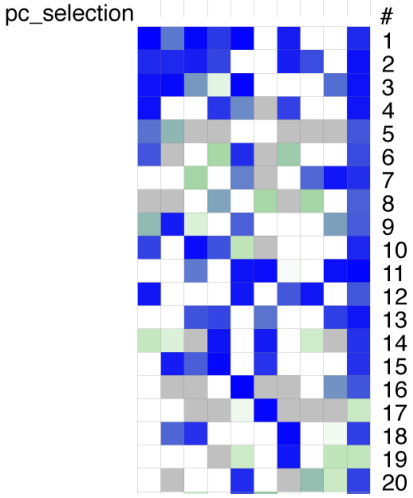

| #  | median_score | type | name                              |
|----|--------------|------|-----------------------------------|
| 1  | -98.91       | CP   | bisindolylmaleimide               |
| 2  | -98.78       | CP   | nifedipine                        |
| 3  | -97.04       | CP   | PKCbeta-inhibitor                 |
| 4  | -96.87       | KD   | FKBP1A                            |
| 5  | -95.86       | CP   | benzo(a)pyrene                    |
| 6  | -95.26       | CP   | TUBB2C                            |
| 7  | -95.18       | KD   | JAK2                              |
| 8  | -95.13       | CP   | BLCAP                             |
| 9  | -93.97       | CP   | AG-14361                          |
| 10 | -93.83       | KD   | EIF4E                             |
| 11 | -93.83       | KD   | MYCBP                             |
| 12 | -93.82       | CP   | RHO-kinase-inhibitor-III[rockout] |
| 13 | -93.33       | CP   | SORBS3                            |
| 14 | -93.24       | CP   | GPR148                            |
| 15 | -92.37       | CP   | SB-216763                         |
| 16 | -91.05       | CP   | PBX1                              |
| 17 | -91.00       | CP   | PD-169316                         |
| 18 | -90.31       | CP   | rucaparib                         |
| 19 | -90.13       | OE   | CEBPG                             |
| 20 | -89.98       | KD   | FAIM                              |

| description                                                      |
|------------------------------------------------------------------|
| CDK inhibitor, PKC inhibitor, leucine rich repeat kinase inhibi  |
| calcium channel blocker, L-type calcium channel blocker          |
| PKC inhibitor                                                    |
| Cis-trans-isomerases, FK506 binding protein 1A, 12kDa            |
| pro carcinogen that is metabolized to the DNA intercalating      |
| Tubulins, tubulin, beta 2C                                       |
| Janus kinase (JakA) family, Janus kinase 2                       |
| bladder cancer associated protein                                |
| PARP inhibitor                                                   |
| Translation Initiation Factor 4E, eukaryotic translation initiat |
| c-myc binding protein                                            |
| ROCK inhibitor                                                   |
| sorbin and SH3 domain containing 3                               |
| GPCR / Class A : Orphans, G protein-coupled receptor 148         |
| glycogen synthase kinase inhibitor                               |
| Homeoboxes / TALE class, pre-B-cell leukemia homeobox            |
| p38 MAPK inhibitor                                               |
| PARP inhibitor                                                   |
| basic leucine zipper proteins, CCAAT/enhancer binding pro        |
| Fas apoptotic inhibitory molecule                                |







Supplementary Figure S7

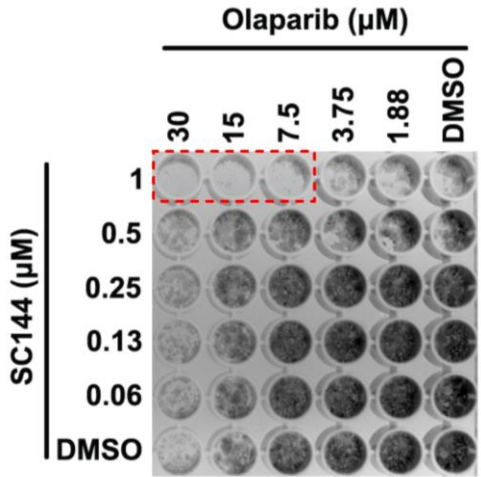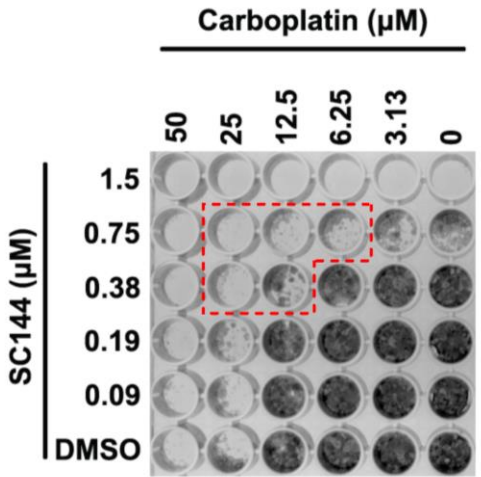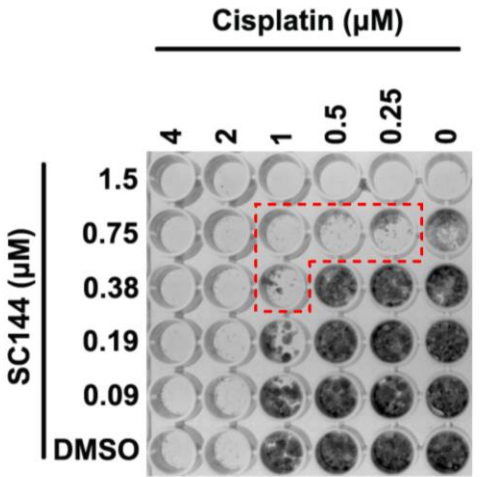

Supplementary Figure S8

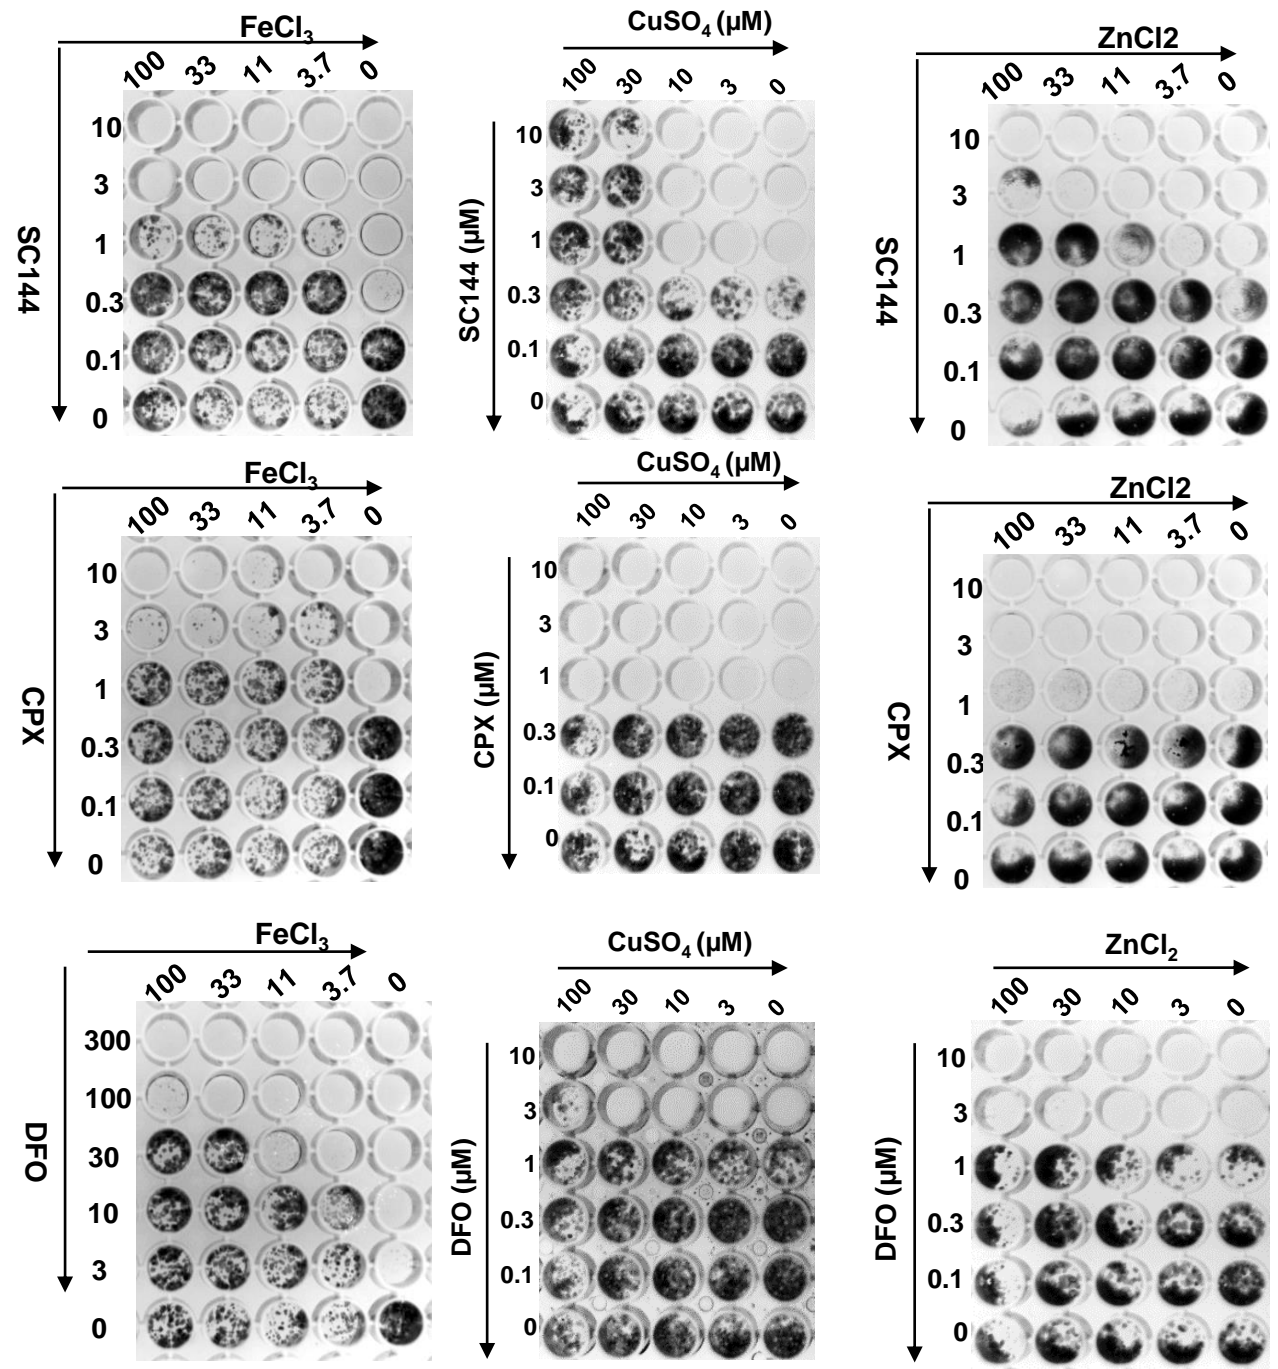

Supplementary Figure S9

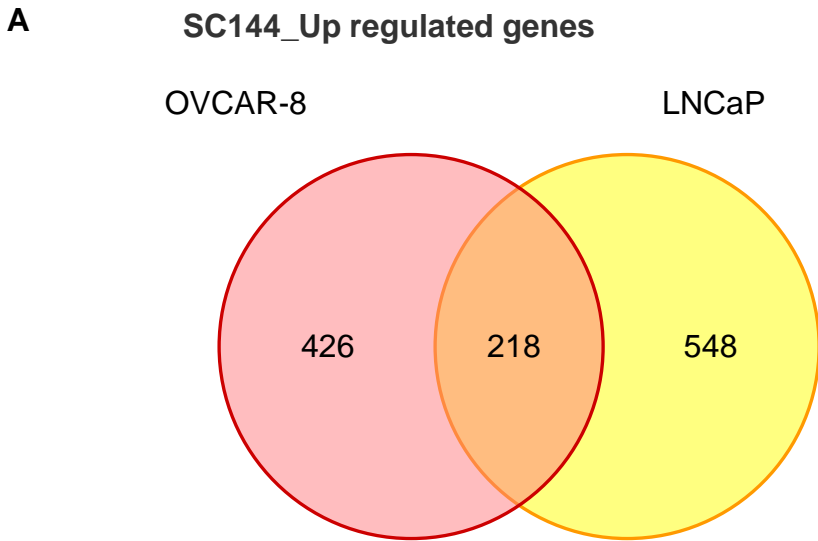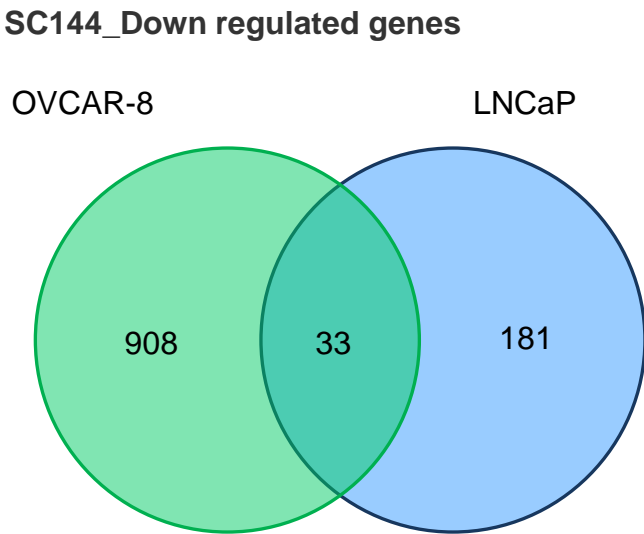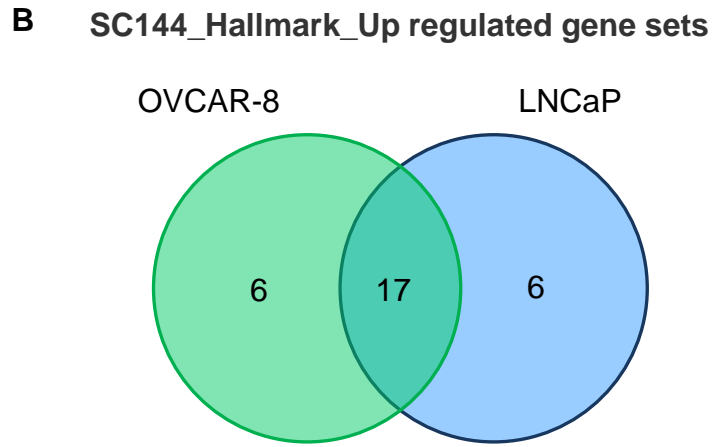

- HYPOXIA
- GLYCOLYSIS
- MTORC1\_SIGNALING
- TNFA\_SIGNALING\_VIA\_NFKB
- INFLAMMATORY\_RESPONSE
- IL6\_JAK\_STAT3\_SIGNALING
- IL2\_STAT5\_SIGNALING
- KRAS\_SIGNALING\_UP
- HEME\_METABOLISM
- CHOLESTEROL\_HOMEOSTASIS
- P53\_PATHWAY
- ANDROGEN\_RESPONSE
- UV\_RESPONSE\_DN
- HEDGEHOG\_SIGNALING
- ANGIOGENESIS
- APOPTOSIS
- ESTROGEN\_RESPONSE\_EARLY

Cut off:  $\pm 2$  fold change

SC144\_Top 25 Up regulated genes

| Gene    | OVCAR-8 | LNCaP  |
|---------|---------|--------|
| PPP1R3C | 33.58   | 35.46  |
| BNIP3   | 29.73   | 26.90  |
| RIMKLA  | 22.21   | 67.35  |
| PDK3    | 21.02   | 32.79  |
| MT1X    | 17.86   | 27.30  |
| C4orf47 | 16.95   | 75.84  |
| RAB20   | 15.76   | 27.13  |
| ANGPTL4 | 13.51   | 186.91 |
| DTNA    | 11.76   | 22.61  |

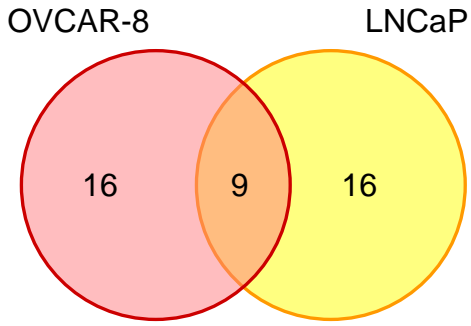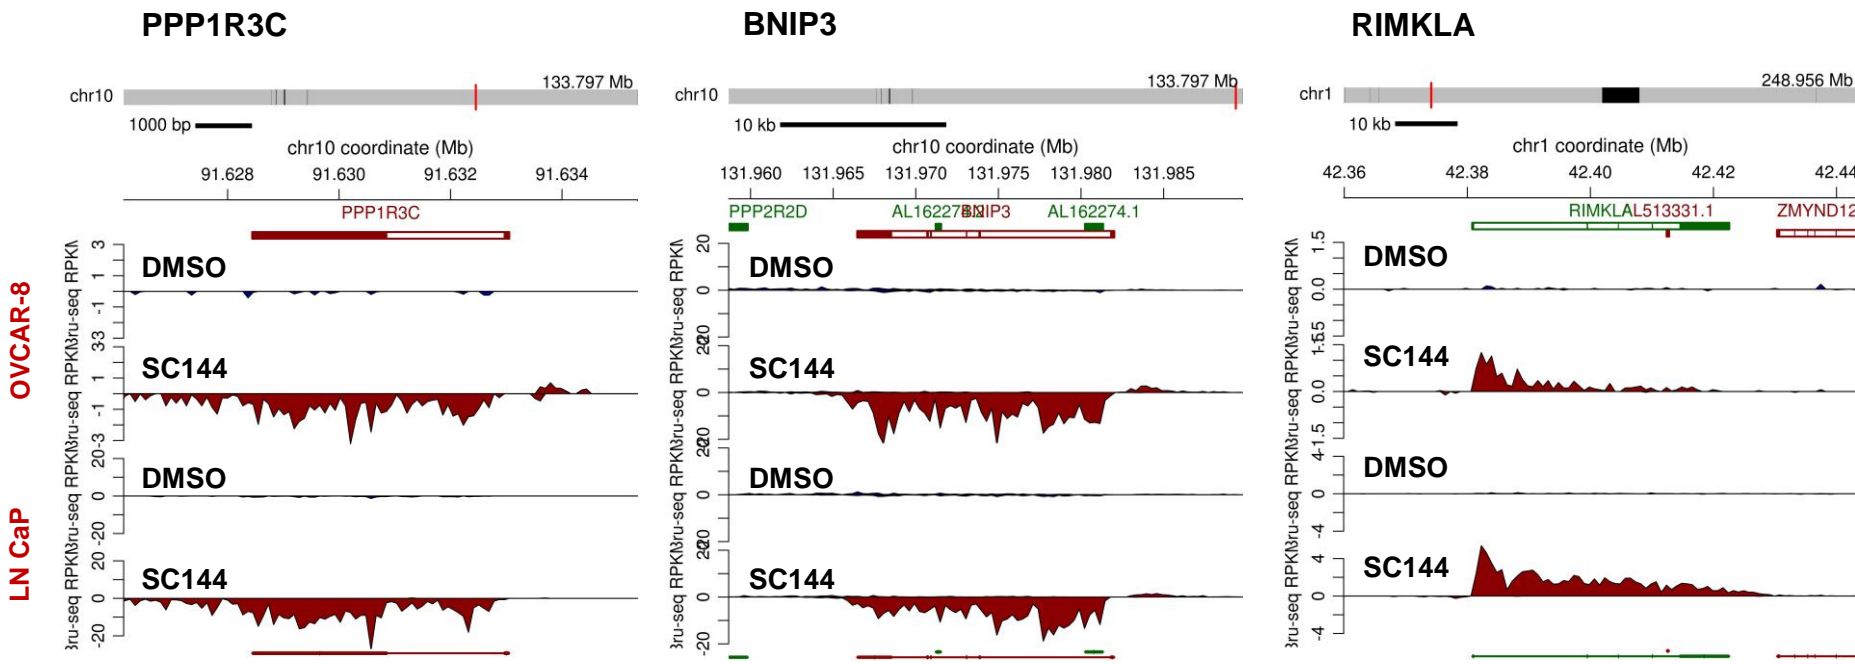

OVCAR-8

LN CaP

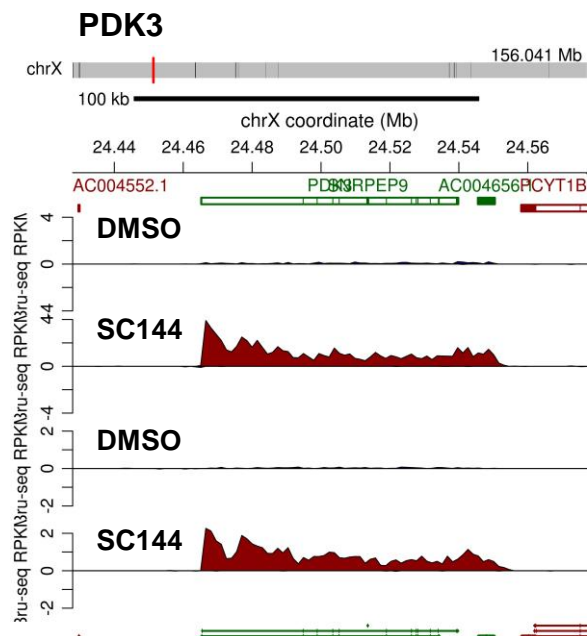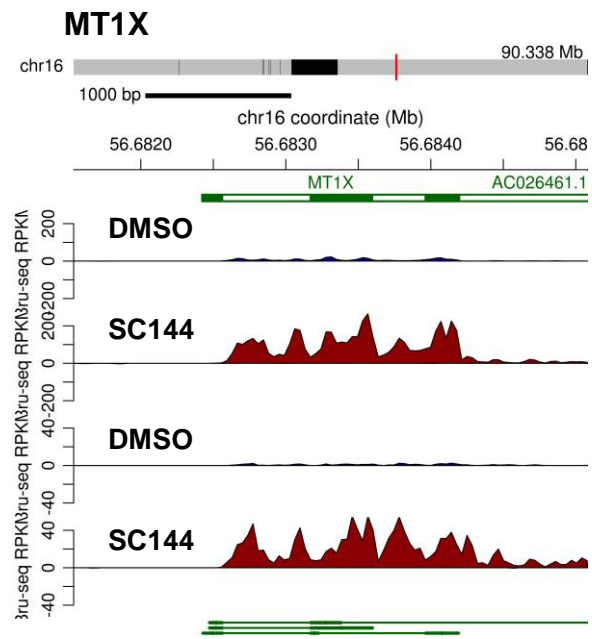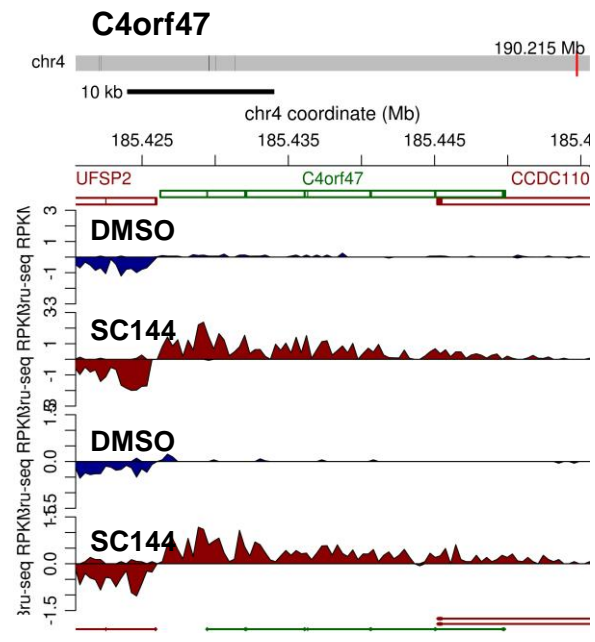

OVCAR-8

LN CaP

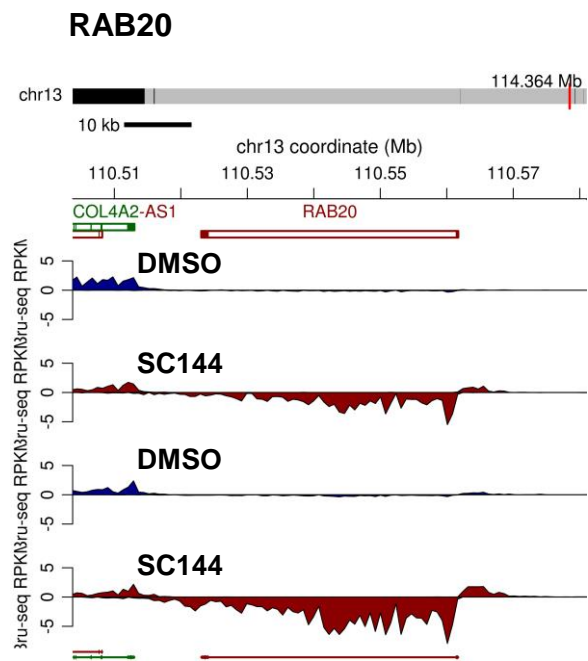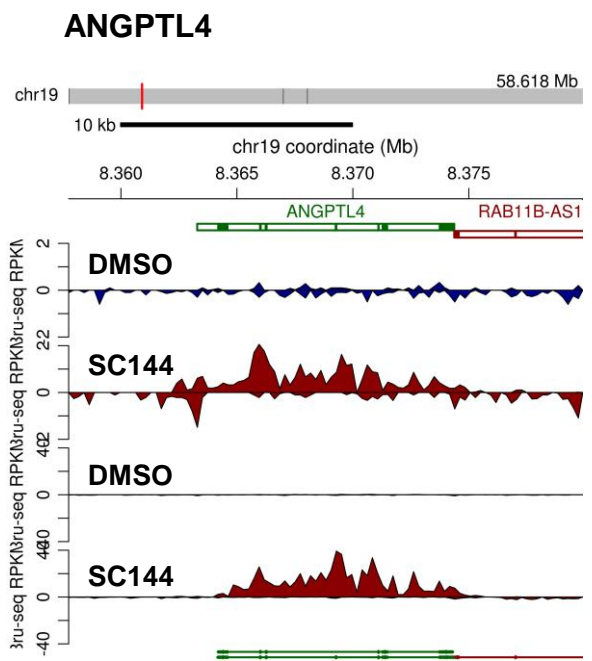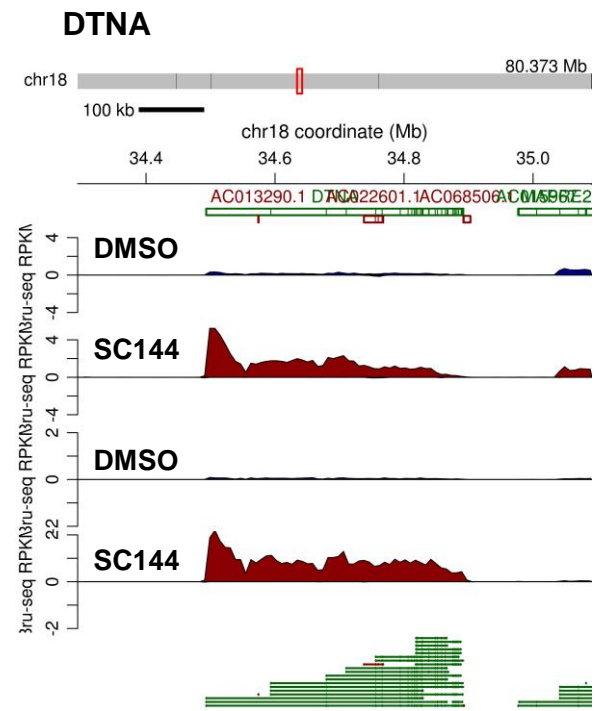

## Supplementary Figure S11

cMap\_compound\_positive

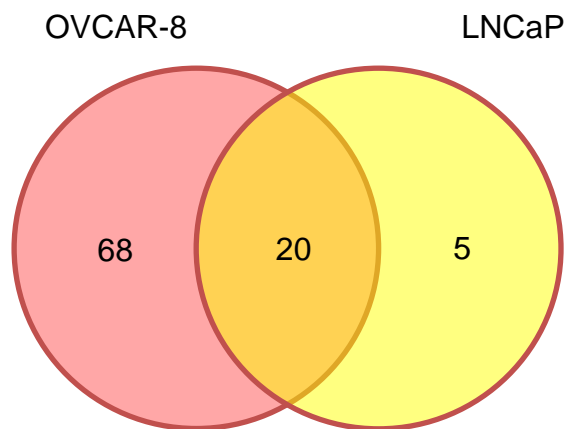

Filter: median score > 90

|    | Name                            | Description                           | Median_score |       |
|----|---------------------------------|---------------------------------------|--------------|-------|
|    |                                 |                                       | OVCAR-8      | LNCaP |
| 1  | TW-37                           | BCL inhibitor, MCL1 inhibitor         | 99.93        | 99.94 |
| 2  | hinokitiol                      | tyrosinase inhibitor                  | 99.9         | 99.94 |
| 3  | MST-312                         | telomerase inhibitor                  | 99.9         | 99.74 |
| 4  | VU-0418947-2                    | hypoxia inducible factor activator    | 99.89        | 99.93 |
| 5  | VU-0418946-1                    | hypoxia inducible factor activator    | 99.88        | 99.93 |
| 6  | SA-1478088                      | metalloproteinase inhibitor           | 99.88        | 99.91 |
| 7  | UK-356618                       | metalloproteinase inhibitor           | 99.88        | 99.29 |
| 8  | BRD-K73610817                   | apoptosis protein inhibitor           | 99.87        | 99.87 |
| 9  | PAC-1                           | caspase activator                     | 99.87        | 99.94 |
| 10 | WAY-170523                      | metalloproteinase inhibitor           | 99.71        | 95.82 |
| 11 | AG-592                          | tyrosine kinase inhibitor             | 99.69        | 94.6  |
| 12 | phorbol-12-myristate-13-acetate | PKC activator, CD antagonist          | 99.28        | 99.28 |
| 13 | ingenol                         | PKC activator                         | 97.71        | 97.69 |
| 14 | prostratin                      | NFkB pathway activator, PKC activator | 97.06        | 97.57 |
| 15 | L-690488                        | inositol monophosphatase inhibitor    | 95.89        | 93.38 |
| 16 | BIX-01294                       | DNA methyltransferase inhibitor       | 95.33        | 95.41 |
| 17 | JTC-801                         | opioid receptor antagonist            | 94.73        | 92.21 |
| 18 | lasalocid                       | ionophore antibiotic                  | 94.49        | 94    |
| 19 | gossypol                        | BCL inhibitor, MCL1 inhibitor         | 93.3         | 95.58 |
| 20 | rhodomyrtoxin-b                 | cytotoxic, DNA intercalator           | 91.67        | 94.76 |

Table S1. Top 25 protein coding genes\_Upregulated\_SC144\_OVCAR-8

| <b>Gene ID</b> | <b>Description</b>                                       | <b>Fold Change</b> |
|----------------|----------------------------------------------------------|--------------------|
| HOXA13         | Homeobox A13                                             | 492.07             |
| HMOX1          | Heme Oxygenase 1                                         | 68.15              |
| ARPP21         | CAMP Regulated Phosphoprotein 21                         | 36.94              |
| PIK3IP1        | Phosphoinositide-3-Kinase Interacting Protein 1          | 36.90              |
| PPP1R3C        | Protein Phosphatase 1 Regulatory Subunit 3C              | 33.58              |
| BNIP3          | BCL2 Interacting Protein 3                               | 29.73              |
| AKR1C3         | Aldo-Keto Reductase Family 1 Member C3                   | 24.73              |
| FAM162A        | Family With Sequence Similarity 162 Member A             | 23.68              |
| PDK1           | Pyruvate Dehydrogenase Kinase 1                          | 22.81              |
| RIMKLA         | Ribosomal Modification Protein RimK Like Family Member A | 22.21              |
| SLC7A11        | Solute Carrier Family 7 Member 11                        | 21.19              |
| EGLN1          | Egl-9 Family Hypoxia Inducible Factor 1                  | 21.06              |
| PDK3           | Pyruvate Dehydrogenase Kinase 3                          | 21.02              |
| NOL4           | Nucleolar Protein 4                                      | 19.09              |
| MT1X           | Metallothionein 1X                                       | 17.86              |
| C4orf47        | Chromosome 4 Open Reading Frame 47                       | 16.95              |
| GLRX           | Glutaredoxin                                             | 16.37              |
| RAB20          | RAB20, Member RAS Oncogene Family                        | 15.76              |
| DDIT4          | DNA Damage Inducible Transcript 4                        | 15.62              |
| CXCL8          | C-X-C Motif Chemokine Ligand 8                           | 14.77              |
| NDRG1          | N-Myc Downstream Regulated 1                             | 13.76              |
| ANGPTL4        | Angiopoietin Like 4                                      | 13.51              |
| KDM7A          | Lysine Demethylase 7A                                    | 12.17              |
| DTNA           | Dystrobrevin Alpha                                       | 11.76              |
| MT1M           | Metallothionein 1M                                       | 10.89              |



Table S2. Top 25 protein coding genes\_Downregulated\_SC144\_OVCAR-8

| <b>Gene ID</b> | <b>Description</b>                    | <b>Fold Change</b> |
|----------------|---------------------------------------|--------------------|
| HIST1H1E       | Histone Cluster 1 H1 Family Member E  | 0.07               |
| HIST1H1B       | Histone Cluster 1 H1 Family Member B  | 0.11               |
| HIST1H2AL      | Histone Cluster 1 H2A Family Member L | 0.12               |
| PLAU           | Plasminogen Activator, Urokinase      | 0.12               |
| HIST1H1D       | Histone Cluster 1 H1 Family Member D  | 0.13               |
| TXNIP          | Thioredoxin Interacting Protein       | 0.14               |
| HIST1H2AI      | Histone Cluster 1 H2A Family Member I | 0.15               |
| HIST1H2BB      | Histone Cluster 1 H2B Family Member B | 0.16               |
| HIST1H1C       | Histone Cluster 1 H1 Family Member C  | 0.18               |
| HIST1H2AM      | Histone Cluster 1 H2A Family Member M | 0.18               |
| HIST1H2BK      | Histone Cluster 1 H2B Family Member K | 0.18               |
| KRT80          | Keratin 80                            | 0.19               |
| THBS1          | Thrombospondin 1                      | 0.19               |
| TRMT61A        | TRNA Methyltransferase 61A            | 0.20               |
| HIST1H3C       | Histone Cluster 1 H3 Family Member C  | 0.20               |
| SSBP4          | Single Stranded DNA Binding Protein 4 | 0.20               |
| HIST1H2BM      | Histone Cluster 1 H2B Family Member M | 0.21               |
| HIST2H2AC      | Histone Cluster 2 H2A Family Member C | 0.21               |
| HIST1H3B       | Histone Cluster 1 H3 Family Member B  | 0.21               |
| HIST1H2AE      | Histone Cluster 1 H2A Family Member E | 0.21               |
| TAGLN          | Transgelin                            | 0.22               |
| OXTR           | Oxytocin Receptor                     | 0.22               |
| GDF6           | Growth Differentiation Factor 6       | 0.22               |
| COX7A1         | Cytochrome C Oxidase Subunit 7A1      | 0.23               |
| ANKRD1         | Ankyrin Repeat Domain 1               | 0.23               |

Table S3. Top 25 non-protein coding genes\_Upregulated\_SC144\_OVCAR-8

| <b>Gene ID</b> | <b>Biotype</b>                     | <b>Fold Change</b> |
|----------------|------------------------------------|--------------------|
| AC006372.1     | lincRNA                            | 274.20             |
| EGLN1P1        | transcribed_processed_pseudogene   | 196.47             |
| AP002852.2     | lincRNA                            | 56.93              |
| AC078883.1     | antisense_RNA                      | 43.61              |
| SCAND2P        | transcribed_unprocessed_pseudogene | 39.80              |
| AC140912.1     | lincRNA                            | 38.00              |
| NMRAL2P        | transcribed_unprocessed_pseudogene | 32.09              |
| LUCAT1         | lincRNA                            | 23.80              |
| LINC00484      | lincRNA                            | 23.02              |
| HLA-V          | transcribed_unprocessed_pseudogene | 22.65              |
| AC097504.1     | processed_pseudogene               | 17.49              |
| AC026461.1     | processed_transcript               | 13.73              |
| PIK3IP1-AS1    | antisense_RNA                      | 12.92              |
| MIR210HG       | lincRNA                            | 12.70              |
| LINC02561      | lincRNA                            | 11.88              |
| AC107918.4     | transcribed_unprocessed_pseudogene | 9.29               |
| AKR1C7P        | transcribed_unprocessed_pseudogene | 8.21               |
| AC006372.3     | lincRNA                            | 8.09               |
| ENO1-AS1       | antisense_RNA                      | 7.98               |
| AL355472.3     | antisense_RNA                      | 7.85               |
| AC048382.5     | antisense_RNA                      | 7.79               |
| AC107021.2     | sense_overlapping                  | 7.55               |
| JHDM1D-AS1     | antisense_RNA                      | 6.92               |
| AC114811.2     | antisense_RNA                      | 6.25               |
| HIF1A-AS2      | lincRNA                            | 6.18               |

Table S4. Top 25 non-protein coding genes\_Downregulated\_SC144\_OVCAR-8

| <b>Gene ID</b> | <b>Biotype</b>                     | <b>Fold Change</b> |
|----------------|------------------------------------|--------------------|
| AC037198.2     | sense_intronic                     | 0.16               |
| ELFN2          | sense_overlapping                  | 0.18               |
| SNORA26        | snoRNA                             | 0.19               |
| OR7H1P         | unprocessed_pseudogene             | 0.22               |
| AC124861.1     | lincRNA                            | 0.22               |
| MIRLET7BHG     | lincRNA                            | 0.23               |
| AP000892.3     | TEC                                | 0.24               |
| OR7E19P        | transcribed_unprocessed_pseudogene | 0.24               |
| AC123912.4     | lincRNA                            | 0.24               |
| DANCR          | processed_transcript               | 0.25               |
| AC005363.1     | transcribed_processed_pseudogene   | 0.25               |
| MIR130B        | processed_transcript               | 0.26               |
| AC023137.1     | lincRNA                            | 0.26               |
| SNORA71A       | snoRNA                             | 0.27               |
| VPS9D1-AS1     | antisense_RNA                      | 0.27               |
| PICRAR         | lincRNA                            | 0.28               |
| SNORA24        | snoRNA                             | 0.28               |
| AC245041.1     | lincRNA                            | 0.29               |
| SLC12A9-AS1    | antisense_RNA                      | 0.29               |
| RNASEH1-AS1    | antisense_RNA                      | 0.30               |
| LINC00596      | lincRNA                            | 0.30               |
| SNORA64        | snoRNA                             | 0.30               |
| ADIRF-AS1      | processed_transcript               | 0.31               |
| SFTA3          | processed_transcript               | 0.31               |
| HMGB3P22       | transcribed_processed_pseudogene   | 0.31               |

Table S5. Top 25 protein coding genes\_Upregulated\_ciclopirox\_OVCAR-8

| <b>Gene</b> | <b>Description</b>                                       | <b>Fold Change</b> |
|-------------|----------------------------------------------------------|--------------------|
| HOXA13      | Homeobox A13                                             | 301.01             |
| PPP1R3C     | Protein Phosphatase 1 Regulatory Subunit 3C              | 44.31              |
| DDIT4       | DNA Damage Inducible Transcript 4                        | 43.41              |
| BNIP3       | BCL2 Interacting Protein 3                               | 28.70              |
| FAM162A     | Family With Sequence Similarity 162 Member A             | 28.34              |
| ANGPTL4     | Angiopoietin Like 4                                      | 23.28              |
| NDRG1       | N-Myc Downstream Regulated 1                             | 22.83              |
| PDK1        | Pyruvate Dehydrogenase Kinase 1                          | 22.82              |
| RIMKLA      | Ribosomal Modification Protein RimK Like Family Member A | 20.29              |
| SPRY1       | Sprouty RTK Signaling Antagonist 1                       | 19.86              |
| C4orf47     | Chromosome 4 Open Reading Frame 47                       | 16.81              |
| PIK3IP1     | Phosphoinositide-3-Kinase Interacting Protein 1          | 16.56              |
| MT1X        | Metallothionein 1X                                       | 16.04              |
| HK2         | Hexokinase 2                                             | 15.67              |
| RAB20       | RAB20, Member RAS Oncogene Family                        | 15.65              |
| CXCR4       | C-X-C Motif Chemokine Receptor 4                         | 13.33              |
| EGLN1       | Egl-9 Family Hypoxia Inducible Factor 1                  | 12.75              |
| BNIP3L      | BCL2 Interacting Protein 3 Like                          | 12.66              |
| HMOX1       | Heme Oxygenase 1                                         | 11.98              |
| GLRX        | Glutaredoxin                                             | 11.41              |
| PFKFB4      | 6-Phosphofructo-2-Kinase/Fructose-2,6-Biphosphatase 4    | 10.85              |
| NOL4        | Nucleolar Protein 4                                      | 10.80              |
| MT1M        | Metallothionein 1M                                       | 10.55              |
| CLEC2B      | C-Type Lectin Domain Family 2 Member B                   | 9.89               |
| RNF122      | Ring Finger Protein 122                                  | 9.87               |

Table S6. Top 25 protein coding genes\_Downregulated\_ciclopirox\_OVCAR-8

| <b>Gene</b> | <b>Description</b>                                                 | <b>Fold Change</b> |
|-------------|--------------------------------------------------------------------|--------------------|
| PLAU        | Plasminogen Activator, Urokinase                                   | 0.092              |
| TXNIP       | Thioredoxin Interacting Protein                                    | 0.22               |
| THBS1       | Thrombospondin 1                                                   | 0.23               |
| NAPRT       | Nicotinate Phosphoribosyltransferase                               | 0.26               |
| WDR73       | WD Repeat Domain 73                                                | 0.29               |
| HIST1H1E    | Histone Cluster 1 H1 Family Member E                               | 0.29               |
| TRMT61A     | TRNA Methyltransferase 61A                                         | 0.29               |
| CXXC1       | CXXC Finger Protein 1                                              | 0.31               |
| SUSD3       | Sushi Domain Containing 3                                          | 0.31               |
| LPCAT4      | Lysophosphatidylcholine Acyltransferase 4                          | 0.31               |
| EDN1        | Endothelin 1                                                       | 0.33               |
| GTPBP3      | GTP Binding Protein 3, Mitochondrial                               | 0.33               |
| RRP9        | Ribosomal RNA Processing 9, U3 Small Nucleolar RNA Binding Protein | 0.34               |
| DUS1L       | Dihydrouridine Synthase 1 Like                                     | 0.34               |
| RHOT2       | Ras Homolog Family Member T2                                       | 0.35               |
| RRS1        | Ribosome Biogenesis Regulator Homolog                              | 0.36               |
| ZNF512B     | Zinc Finger Protein 512B                                           | 0.36               |
| BOP1        | Block Of Proliferation 1                                           | 0.37               |
| INCENP      | Inner Centromere Protein                                           | 0.37               |
| FGF18       | Fibroblast Growth Factor 18                                        | 0.37               |
| CHTF18      | Chromosome Transmission Fidelity Factor 18                         | 0.37               |
| ID3         | Inhibitor Of DNA Binding 3, HLH Protein                            | 0.37               |
| RGS3        | Regulator Of G Protein Signaling 3                                 | 0.37               |
| TTL12       | Tubulin Tyrosine Ligase Like 12                                    | 0.37               |
| CAPN10      | Calpain 10                                                         | 0.37               |

Table S7. Top 25 non-protein coding genes\_Upregulated\_ciclopirox\_OVCAR-8

| <b>Gene</b> | <b>Biotype</b>                     | <b>Fold Change</b> |
|-------------|------------------------------------|--------------------|
| AC006372.1  | lincRNA                            | 238.24             |
| EGLN1P1     | transcribed_processed_pseudogene   | 176.00             |
| AC078883.1  | antisense_RNA                      | 40.23              |
| LINC00484   | lincRNA                            | 33.36              |
| SCAND2P     | transcribed_unprocessed_pseudogene | 32.04              |
| AC140912.1  | lincRNA                            | 31.72              |
| AP002852.2  | lincRNA                            | 27.50              |
| HLA-V       | transcribed_unprocessed_pseudogene | 26.62              |
| MIR210HG    | lincRNA                            | 21.80              |
| AC097504.1  | processed_pseudogene               | 19.63              |
| HIF1A-AS2   | lincRNA                            | 12.95              |
| AC026461.1  | processed_transcript               | 12.04              |
| SDAD1P1     | transcribed_processed_pseudogene   | 11.15              |
| NMRAL2P     | transcribed_unprocessed_pseudogene | 10.17              |
| AC097534.2  | antisense_RNA                      | 9.92               |
| AC107918.4  | transcribed_unprocessed_pseudogene | 9.03               |
| AL355472.3  | antisense_RNA                      | 8.75               |
| ENO1-AS1    | antisense_RNA                      | 8.27               |
| AC107021.2  | sense_overlapping                  | 7.92               |
| AP000695.1  | antisense_RNA                      | 7.82               |
| DARS-AS1    | antisense_RNA                      | 7.60               |
| LUCAT1      | lincRNA                            | 7.55               |
| AC022400.8  | TEC                                | 7.49               |
| LINC01291   | lincRNA                            | 7.42               |
| AC048382.5  | antisense_RNA                      | 6.93               |

Table S8. Top 25 non-protein coding genes\_Downregulated\_ciclopirox\_OVCAR-8

| <b>Gene</b> | <b>Biotype</b>                     | <b>Fold Change</b> |
|-------------|------------------------------------|--------------------|
| AC037198.2  | sense_intronic                     | 0.19               |
| OR7H1P      | unprocessed_pseudogene             | 0.30               |
| VPS9D1-AS1  | antisense_RNA                      | 0.30               |
| MIR600HG    | sense_intronic                     | 0.34               |
| SNORA71A    | snoRNA                             | 0.36               |
| AC002558.1  | processed_pseudogene               | 0.36               |
| AC130462.1  | processed_transcript               | 0.37               |
| AC027307.3  | lincRNA                            | 0.37               |
| TMEM147-AS1 | antisense_RNA                      | 0.39               |
| FAM86C2P    | transcribed_unprocessed_pseudogene | 0.39               |
| FAM222A-AS1 | antisense_RNA                      | 0.40               |
| AL356356.1  | antisense_RNA                      | 0.40               |
| AC005363.1  | transcribed_processed_pseudogene   | 0.40               |
| MIRLET7BHG  | lincRNA                            | 0.41               |
| SLC12A9-AS1 | antisense_RNA                      | 0.41               |
| DNM1P38     | unprocessed_pseudogene             | 0.41               |
| ADIRF-AS1   | processed_transcript               | 0.42               |
| SNORD83A    | snoRNA                             | 0.42               |
| SNORA26     | snoRNA                             | 0.42               |
| KNOP1P4     | processed_pseudogene               | 0.43               |
| SP2-AS1     | antisense_RNA                      | 0.43               |
| SNORA64     | snoRNA                             | 0.43               |
| AL391095.3  | lincRNA                            | 0.44               |
| TYRO3P      | processed_pseudogene               | 0.44               |
| SNORA21     | snoRNA                             | 0.45               |

Table S9. Top 25 protein coding genes\_Upregulated\_SC144\_LN CaP

| <b>Gene ID</b> | <b>Description</b>                                       | <b>Fold Change</b> |
|----------------|----------------------------------------------------------|--------------------|
| ANGPTL4        | Angiopoietin Like 4                                      | 186.91             |
| STC1           | Stanniocalcin 1                                          | 116.57             |
| CA9            | Carbonic Anhydrase 9                                     | 100.84             |
| EGLN3          | Egl-9 Family Hypoxia Inducible Factor 3                  | 78.91              |
| C4orf47        | Chromosome 4 Open Reading Frame 47                       | 75.84              |
| RIMKLA         | Ribosomal Modification Protein RimK Like Family Member A | 67.35              |
| PPFIA4         | PTPRF Interacting Protein Alpha 4                        | 58.60              |
| PFKFB4         | 6-Phosphofructo-2-Kinase/Fructose-2,6-Biphosphatase 4    | 57.78              |
| ISM2           | Isthmin 2                                                | 49.44              |
| DOK3           | Docking Protein 3                                        | 48.14              |
| MTCP1          | Mature T Cell Proliferation 1                            | 44.62              |
| PPP1R3C        | Protein Phosphatase 1 Regulatory Subunit 3C              | 35.46              |
| PDK3           | Pyruvate Dehydrogenase Kinase 3                          | 32.79              |
| HK2            | Hexokinase 2                                             | 32.73              |
| HILPDA         | Hypoxia Inducible Lipid Droplet Associated               | 31.35              |
| SLC2A3         | Solute Carrier Family 2 Member 3                         | 30.81              |
| STC2           | Stanniocalcin 2                                          | 29.88              |
| MT1X           | Metallothionein 1X                                       | 27.30              |
| RAB20          | RAB20, Member RAS Oncogene Family                        | 27.13              |
| BNIP3          | BCL2 Interacting Protein 3                               | 26.90              |
| IGFBP3         | Insulin Like Growth Factor Binding Protein 3             | 26.74              |
| DTNA           | Dystrobrevin Alpha                                       | 22.61              |
| GRIK4          | Glutamate Ionotropic Receptor Kainate Type Subunit 4     | 22.40              |
| ENO2           | Enolase 2                                                | 21.69              |
| CA12           | Carbonic Anhydrase 12                                    | 21.07              |



Table S10. Top 25 protein coding genes\_Downregulated\_SC144\_LN CaP

| <b>Gene ID</b> | <b>Description</b>                                                   | <b>Fold Change</b> |
|----------------|----------------------------------------------------------------------|--------------------|
| TXNIP          | Thioredoxin Interacting Protein                                      | 0.13               |
| LHX4           | LIM Homeobox 4                                                       | 0.18               |
| IGFBP2         | Insulin Like Growth Factor Binding Protein 2                         | 0.21               |
| PELI1          | Pellino E3 Ubiquitin Protein Ligase 1                                | 0.21               |
| MSX1           | Msh Homeobox 1                                                       | 0.24               |
| MEGF9          | Multiple EGF Like Domains 9                                          | 0.24               |
| PER3           | Period Circadian Regulator 3                                         | 0.24               |
| C5orf67        | Chromosome 5 Open Reading Frame 67                                   | 0.24               |
| CYP24A1        | Cytochrome P450 Family 24 Subfamily A Member 1                       | 0.25               |
| GGT5           | Gamma-Glutamyltransferase 5                                          | 0.25               |
| KCNK5          | Potassium Two Pore Domain Channel Subfamily K Member 5               | 0.28               |
| ANKDD1A        | Ankyrin Repeat And Death Domain Containing 1A                        | 0.29               |
| ARL9           | ADP Ribosylation Factor Like GTPase 9                                | 0.30               |
| WNT7B          | Wnt Family Member 7B                                                 | 0.30               |
| CABLES1        | Cdk5 And Abl Enzyme Substrate 1                                      | 0.31               |
| AKR1B10        | Aldo-Keto Reductase Family 1 Member B10                              | 0.31               |
| TMEM37         | Transmembrane Protein 37                                             | 0.31               |
| PPM1L          | Protein Phosphatase, Mg <sup>2+</sup> /Mn <sup>2+</sup> Dependent 1L | 0.32               |
| PLEKHH2        | Pleckstrin Homology, MyTH4 And FERM Domain Containing H2             | 0.32               |
| C4BPB          | Complement Component 4 Binding Protein Beta                          | 0.33               |
| SLC16A5        | Solute Carrier Family 16 Member 5                                    | 0.33               |
| ZNF799         | Zinc Finger Protein 799                                              | 0.33               |
| TEF            | TEF, PAR BZIP Transcription Factor                                   | 0.34               |
| CHML           | CHM Like, Rab Escort Protein 2                                       | 0.34               |
| DIRAS2         | DIRAS Family GTPase 2                                                | 0.34               |

Table S11. Top 25 non-protein coding genes\_Upregulated\_SC144\_LN CaP

| <b>Gene ID</b> | <b>Biotype</b>                     | <b>Fold Change</b> |
|----------------|------------------------------------|--------------------|
| TTC21B-AS1     | processed_transcript               | 183.98             |
| AC004656.1     | sense_overlapping                  | 79.35              |
| AC097534.2     | antisense_RNA                      | 44.71              |
| AC026461.1     | processed_transcript               | 35.61              |
| AC078883.1     | antisense_RNA                      | 28.34              |
| EGLN1P1        | transcribed_processed_pseudogene   | 23.24              |
| SCAND2P        | transcribed_unprocessed_pseudogene | 22.48              |
| LINC00887      | lincRNA                            | 19.45              |
| HIF1A-AS2      | lincRNA                            | 17.10              |
| AC010655.4     | processed_transcript               | 17.08              |
| SDAD1P1        | transcribed_processed_pseudogene   | 15.76              |
| AC022400.8     | TEC                                | 15.35              |
| DARS-AS1       | antisense_RNA                      | 14.95              |
| AL137918.1     | TEC                                | 14.67              |
| AC136604.3     | antisense_RNA                      | 11.64              |
| MIR210HG       | lincRNA                            | 11.57              |
| HYMAI          | non_coding                         | 10.92              |
| HLA-L          | transcribed_unprocessed_pseudogene | 10.06              |
| AC011726.3     | sense_intronic                     | 9.93               |
| LDHAP7         | processed_pseudogene               | 9.68               |
| AC011726.2     | sense_intronic                     | 8.70               |
| NR2F2-AS1      | antisense_RNA                      | 8.58               |
| AC016251.2     | TEC                                | 8.54               |
| AC099795.2     | processed_pseudogene               | 8.35               |
| AC016251.1     | TEC                                | 8.27               |

Table S12. Top 25 non-protein coding genes\_Downregulated\_SC144\_LN CaP

| <b>Gene ID</b> | <b>Biotype</b>                     | <b>Fold Change</b> |
|----------------|------------------------------------|--------------------|
| AC105202.1     | lincRNA                            | 0.22               |
| AL137129.1     | processed_transcript               | 0.24               |
| SFTA1P         | lincRNA                            | 0.26               |
| PLCE1-AS1      | antisense_RNA                      | 0.27               |
| AC091181.1     | TEC                                | 0.30               |
| AC007684.1     | sense_intronic                     | 0.36               |
| AC234772.2     | lincRNA                            | 0.36               |
| AC018521.1     | processed_transcript               | 0.36               |
| LINC01750      | lincRNA                            | 0.37               |
| AL603839.3     | antisense_RNA                      | 0.37               |
| AC068888.1     | antisense_RNA                      | 0.40               |
| AC103691.1     | antisense_RNA                      | 0.43               |
| AP000941.1     | antisense_RNA                      | 0.43               |
| AL356273.3     | TEC                                | 0.43               |
| MYLK-AS1       | antisense_RNA                      | 0.44               |
| AC008969.1     | processed_transcript               | 0.44               |
| AC107980.1     | sense_intronic                     | 0.45               |
| LINC02331      | lincRNA                            | 0.46               |
| AC009502.1     | lincRNA                            | 0.46               |
| AC090833.1     | lincRNA                            | 0.47               |
| AC006058.1     | lincRNA                            | 0.48               |
| RN7SL2         | misc_RNA                           | 0.48               |
| RPL24P8        | processed_pseudogene               | 0.48               |
| BTN2A3P        | transcribed_unprocessed_pseudogene | 0.49               |
| LINC00472      | lincRNA                            | 0.49               |

Table S13. Gene sets positively correlated with SC144 OVCAR-8

| <b>NAME</b>                              | <b>SIZE</b> | <b>ES</b> | <b>NES</b> | <b>NOM p-val</b> | <b>FDR q-val</b> | <b>FWER p-val</b> |
|------------------------------------------|-------------|-----------|------------|------------------|------------------|-------------------|
| HALLMARK_HYPOXIA                         | 142         | 0.73      | 3.15       | 0                | 0                | 0                 |
| HALLMARK_GLYCOLYSIS                      | 154         | 0.54      | 2.32       | 0                | 0                | 0                 |
| HALLMARK_MTORC1_SIGNALING                | 184         | 0.50      | 2.24       | 0                | 0                | 0                 |
| HALLMARK_TNFA_SIGNALING_VIA_NFKB         | 159         | 0.51      | 2.19       | 0                | 0                | 0                 |
| HALLMARK_INFLAMMATORY_RESPONSE           | 92          | 0.55      | 2.15       | 0                | 0                | 0                 |
| HALLMARK_IL6_JAK_STAT3_SIGNALING         | 46          | 0.57      | 1.97       | 0                | 0.003            | 0.009             |
| HALLMARK_IL2_STAT5_SIGNALING             | 120         | 0.46      | 1.94       | 0                | 0.003            | 0.014             |
| HALLMARK_COMPLEMENT                      | 112         | 0.46      | 1.91       | 0                | 0.004            | 0.021             |
| HALLMARK_REACTIVE_OXIGEN_SPECIES_PATHWAY | 37          | 0.56      | 1.86       | 0.005            | 0.005            | 0.027             |
| HALLMARK_KRAS_SIGNALING_UP               | 91          | 0.46      | 1.83       | 0                | 0.005            | 0.03              |
| HALLMARK_PROTEIN_SECRETION               | 91          | 0.44      | 1.74       | 0                | 0.009            | 0.063             |
| HALLMARK_HEME_METABOLISM                 | 143         | 0.39      | 1.66       | 0                | 0.016            | 0.114             |
| HALLMARK_CHOLESTEROL_HOMEOSTASIS         | 58          | 0.43      | 1.61       | 0.015            | 0.020            | 0.151             |
| HALLMARK_P53_PATHWAY                     | 150         | 0.37      | 1.60       | 0.005            | 0.022            | 0.175             |
| HALLMARK_ANDROGEN_RESPONSE               | 84          | 0.40      | 1.58       | 0.005            | 0.023            | 0.192             |
| HALLMARK_UV_RESPONSE_DN                  | 123         | 0.37      | 1.57       | 0.004            | 0.023            | 0.202             |
| HALLMARK_HEDGEHOG_SIGNALING              | 18          | 0.52      | 1.48       | 0.067            | 0.044            | 0.375             |
| HALLMARK_XENOBIOTIC_METABOLISM           | 109         | 0.35      | 1.44       | 0.014            | 0.057            | 0.479             |
| HALLMARK_BILE_ACID_METABOLISM            | 50          | 0.36      | 1.28       | 0.138            | 0.165            | 0.876             |
| HALLMARK_ANGIOGENESIS                    | 16          | 0.46      | 1.28       | 0.158            | 0.163            | 0.881             |
| HALLMARK_APOPTOSIS                       | 122         | 0.30      | 1.26       | 0.090            | 0.177            | 0.912             |
| HALLMARK_INTERFERON_GAMMA_RESPONSE       | 119         | 0.30      | 1.25       | 0.104            | 0.181            | 0.928             |
| HALLMARK_ESTROGEN_RESPONSE_EARLY         | 135         | 0.28      | 1.21       | 0.123            | 0.216            | 0.96              |

Table S14. Gene sets negatively correlated with SC144 OVCAR-8

| <b>NAME</b>                        | <b>SIZE</b> | <b>ES</b> | <b>NES</b> | <b>NOM p-val</b> | <b>FDR q-val</b> | <b>FWER p-val</b> |
|------------------------------------|-------------|-----------|------------|------------------|------------------|-------------------|
| HALLMARK_MYC_TARGETS_V2            | 56          | -0.61     | -2.21      | 0                | 0                | 0                 |
| HALLMARK_OXIDATIVE_PHOSPHORYLATION | 179         | -0.36     | -1.60      | 0                | 0.038            | 0.134             |
| HALLMARK_INTERFERON_ALPHA_RESPONSE | 63          | -0.37     | -1.37      | 0.052            | 0.215            | 0.705             |
| HALLMARK_DNA_REPAIR                | 124         | -0.32     | -1.35      | 0.048            | 0.187            | 0.755             |

Table S15. Gene sets positively correlated with ciclopirox OVCAR-8

| <b>NAME</b>                              | <b>SIZE</b> | <b>ES</b> | <b>NES</b> | <b>NOM p-val</b> | <b>FDR q-val</b> | <b>FWER p-val</b> |
|------------------------------------------|-------------|-----------|------------|------------------|------------------|-------------------|
| HALLMARK_HYPOXIA                         | 144         | 0.79      | 3.28       | 0                | 0                | 0                 |
| HALLMARK_GLYCOLYSIS                      | 156         | 0.63      | 2.68       | 0                | 0                | 0                 |
| HALLMARK_MTORC1_SIGNALING                | 185         | 0.54      | 2.30       | 0                | 0                | 0                 |
| HALLMARK_TNFA_SIGNALING_VIA_NFKB         | 158         | 0.42      | 1.78       | 0                | 0.015            | 0.047             |
| HALLMARK_IL2_STAT5_SIGNALING             | 117         | 0.44      | 1.73       | 0.002            | 0.018            | 0.069             |
| HALLMARK_HEME_METABOLISM                 | 142         | 0.39      | 1.61       | 0                | 0.050            | 0.208             |
| HALLMARK_KRAS_SIGNALING_UP               | 91          | 0.41      | 1.59       | 0.004            | 0.049            | 0.230             |
| HALLMARK_HEDGEHOG_SIGNALING              | 17          | 0.60      | 1.58       | 0.042            | 0.045            | 0.241             |
| HALLMARK_INFLAMMATORY_RESPONSE           | 89          | 0.40      | 1.55       | 0.025            | 0.051            | 0.301             |
| HALLMARK_PROTEIN_SECRETION               | 91          | 0.39      | 1.48       | 0.029            | 0.078            | 0.455             |
| HALLMARK_REACTIVE_OXIGEN_SPECIES_PATHWAY | 37          | 0.45      | 1.45       | 0.056            | 0.090            | 0.538             |
| HALLMARK_P53_PATHWAY                     | 150         | 0.34      | 1.41       | 0.027            | 0.115            | 0.655             |
| HALLMARK_CHOLESTEROL_HOMEOSTASIS         | 58          | 0.39      | 1.39       | 0.065            | 0.119            | 0.689             |
| HALLMARK_ANDROGEN_RESPONSE               | 84          | 0.35      | 1.33       | 0.071            | 0.159            | 0.808             |
| HALLMARK_UV_RESPONSE_DN                  | 121         | 0.32      | 1.26       | 0.115            | 0.238            | 0.926             |
| HALLMARK_ADIPOGENESIS                    | 145         | 0.30      | 1.26       | 0.072            | 0.227            | 0.930             |
| HALLMARK_ESTROGEN_RESPONSE_EARLY         | 133         | 0.30      | 1.24       | 0.110            | 0.242            | 0.952             |

Table S16. Gene sets negatively correlated with ciclopirox OVCAR-8

| <b>NAME</b>                        | <b>SIZE</b> | <b>ES</b> | <b>NES</b> | <b>NOM p-val</b> | <b>FDR q-val</b> | <b>FWER p-val</b> |
|------------------------------------|-------------|-----------|------------|------------------|------------------|-------------------|
| HALLMARK_MYC_TARGETS_V2            | 56          | -0.56     | -1.98      | 0                | 0                | 0                 |
| HALLMARK_MITOTIC_SPINDLE           | 195         | -0.36     | -1.58      | 0                | 0.051            | 0.138             |
| HALLMARK_G2M_CHECKPOINT            | 191         | -0.35     | -1.54      | 0.002            | 0.052            | 0.198             |
| HALLMARK_E2F_TARGETS               | 195         | -0.33     | -1.47      | 0.002            | 0.078            | 0.359             |
| HALLMARK_OXIDATIVE_PHOSPHORYLATION | 179         | -0.33     | -1.46      | 0.008            | 0.072            | 0.401             |
| HALLMARK_DNA_REPAIR                | 123         | -0.35     | -1.45      | 0.006            | 0.062            | 0.409             |
| HALLMARK_APICAL_JUNCTION           | 114         | -0.34     | -1.41      | 0.018            | 0.074            | 0.520             |
| HALLMARK_TGF_BETA_SIGNALING        | 48          | -0.38     | -1.32      | 0.091            | 0.131            | 0.796             |

Table S17. Gene sets positively correlated with SC144 LN CaP

| NAME                                       | SIZE | ES   | NES  | NOM p-val | FDR q-val | FWER p-val |
|--------------------------------------------|------|------|------|-----------|-----------|------------|
| HALLMARK_HYPOXIA                           | 138  | 0.86 | 2.70 | 0         | 0         | 0          |
| HALLMARK_GLYCOLYSIS                        | 142  | 0.74 | 2.34 | 0         | 0         | 0          |
| HALLMARK_TNFA_SIGNALING_VIA_NFKB           | 141  | 0.69 | 2.15 | 0         | 0         | 0          |
| HALLMARK_MTORC1_SIGNALING                  | 177  | 0.58 | 1.85 | 0         | 0.001     | 0.004      |
| HALLMARK_EPITHELIAL_MESENCHYMAL_TRANSITION | 115  | 0.55 | 1.71 | 0         | 0.011     | 0.057      |
| HALLMARK_HEDGEHOG_SIGNALING                | 17   | 0.71 | 1.68 | 0.010     | 0.012     | 0.073      |
| HALLMARK_KRAS_SIGNALING_UP                 | 75   | 0.55 | 1.62 | 0.002     | 0.020     | 0.138      |
| HALLMARK_MYOGENESIS                        | 80   | 0.54 | 1.62 | 0.001     | 0.020     | 0.159      |
| HALLMARK_INFLAMMATORY_RESPONSE             | 87   | 0.52 | 1.57 | 0.008     | 0.034     | 0.283      |
| HALLMARK_IL6_JAK_STAT3_SIGNALING           | 42   | 0.56 | 1.54 | 0.020     | 0.040     | 0.342      |
| HALLMARK_COAGULATION                       | 49   | 0.54 | 1.52 | 0.019     | 0.047     | 0.417      |
| HALLMARK_HEME_METABOLISM                   | 131  | 0.48 | 1.50 | 0.006     | 0.050     | 0.454      |
| HALLMARK_UV_RESPONSE_DN                    | 109  | 0.49 | 1.50 | 0.007     | 0.047     | 0.458      |
| HALLMARK_P53_PATHWAY                       | 144  | 0.48 | 1.50 | 0.007     | 0.045     | 0.468      |
| HALLMARK_IL2_STAT5_SIGNALING               | 112  | 0.48 | 1.46 | 0.010     | 0.061     | 0.607      |
| HALLMARK_UNFOLDED_PROTEIN_RESPONSE         | 96   | 0.45 | 1.37 | 0.057     | 0.133     | 0.895      |
| HALLMARK_TGF_BETA_SIGNALING                | 46   | 0.49 | 1.35 | 0.116     | 0.153     | 0.931      |
| HALLMARK_ANGIOGENESIS                      | 15   | 0.59 | 1.35 | 0.129     | 0.150     | 0.942      |
| HALLMARK_ESTROGEN_RESPONSE_EARLY           | 133  | 0.42 | 1.33 | 0.048     | 0.161     | 0.954      |
| HALLMARK_ANDROGEN_RESPONSE                 | 80   | 0.43 | 1.30 | 0.102     | 0.192     | 0.982      |
| HALLMARK_ALLOGRAFT_REJECTION               | 79   | 0.43 | 1.29 | 0.103     | 0.189     | 0.987      |
| HALLMARK_APOPTOSIS                         | 115  | 0.41 | 1.29 | 0.091     | 0.186     | 0.988      |
| HALLMARK_CHOLESTEROL_HOMEOSTASIS           | 55   | 0.45 | 1.27 | 0.155     | 0.213     | 0.993      |



Table S18. Gene sets negatively correlated with SC144 LN CaP

| <b>NAME</b>                | <b>SIZE</b> | <b>ES</b> | <b>NES</b> | <b>NOM p-val</b> | <b>FDR q-val</b> | <b>FWER p-val</b> |
|----------------------------|-------------|-----------|------------|------------------|------------------|-------------------|
| HALLMARK_MYC_TARGETS_V2    | 51          | -0.40     | -1.58      | 0.005            | 0.103            | 0.071             |
| HALLMARK_KRAS_SIGNALING_DN | 37          | -0.44     | -1.54      | 0.031            | 0.062            | 0.083             |
| HALLMARK_E2F_TARGETS       | 188         | -0.28     | -1.25      | 0.040            | 0.219            | 0.475             |

Table S19. cMap\_Compound\_SC144\_OVCAR-8\_Up

| <b>Name</b>                     | <b>Description</b>                                                                      | <b>Target</b>                                               | <b>Median_score</b> |
|---------------------------------|-----------------------------------------------------------------------------------------|-------------------------------------------------------------|---------------------|
| TW-37                           | BCL inhibitor, MCL1 inhibitor                                                           | BCL2, BCL2L1, MCL1                                          | 99.93               |
| hinokitiol                      | tyrosinase inhibitor                                                                    | TYR                                                         | 99.9                |
| MST-312                         | telomerase inhibitor                                                                    | TERT                                                        | 99.9                |
| VU-0418947-2                    | hypoxia inducible factor activator                                                      |                                                             | 99.89               |
| VU-0418946-1                    | hypoxia inducible factor activator                                                      | HIF1A                                                       | 99.88               |
| SA-1478088                      | metalloproteinase inhibitor                                                             | MMP12, MMP14, MMP2, MMP8, MMP9                              | 99.88               |
| UK-356618                       | metalloproteinase inhibitor                                                             | MMP3, MMP13, MMP14, MMP2, MMP9                              | 99.88               |
| BRD-K73610817                   | apoptosis protein inhibitor                                                             |                                                             | 99.87               |
| PAC-1                           | caspase activator                                                                       | CASP3                                                       | 99.87               |
| PAC-1                           | caspase activator                                                                       | CASP3                                                       | 99.84               |
| WAY-170523                      | metalloproteinase inhibitor                                                             | MMP13                                                       | 99.71               |
| AG-592                          | tyrosine kinase inhibitor                                                               |                                                             | 99.69               |
| MLN-4924                        | nedd activating enzyme inhibitor                                                        | NAE1, UBA3                                                  | 99.6                |
| NSC-632839                      | ubiquitin hydrolase inhibitor, ubiquitin isopeptidase inhibitor                         | USP2, USP7, SENP2, USP1                                     | 99.51               |
| NSC-632839                      | ubiquitin hydrolase inhibitor, ubiquitin isopeptidase inhibitor                         | USP2, USP7, SENP2, USP1                                     | 99.42               |
| phorbol-12-myristate-13-acetate | PKC activator, CD antagonist                                                            | CD4, KCNT2, PRKCA, TRPV4                                    | 99.28               |
| thiostrepton                    | downregulates FOXM1 expression, FOXM1 expression inhibitor, protein synthesis inhibitor | FOXM1                                                       | 99.24               |
| disulfiram                      | aldehyde dehydrogenase inhibitor, DNA methyltransferase inhibitor, TRPA1 agonist        | ALDH2, ALDH1A2, ALDH5A1, ALDH7A1, CYP2E1, DBH, DNMT1, TRPA1 | 99.24               |
| MLN-2238                        | proteasome inhibitor                                                                    | PSMB1                                                       | 99.12               |
| iodoacetic-acid                 | cysteine peptidase inhibitor                                                            |                                                             | 99.11               |
| z-leu3-VS                       | PGPH inhibitor, proteasome inhibitor                                                    |                                                             | 99.1                |
| 15-delta-prostaglandin-j2       | PPAR receptor agonist, FXR antagonist                                                   | PPARG, NR1H4                                                | 99.02               |
| CA-074-Me                       | cathepsin inhibitor, antiamyloidogenic agent                                            | CTSB                                                        | 98.99               |
| parthenolide                    | NFkB pathway inhibitor, adiponectin receptor agonist                                    | ADIPOR2, IKBKB, RELA                                        | 98.9                |
| MG-132                          | proteasome inhibitor                                                                    | PSMB1                                                       | 98.88               |

Table S20. cMap\_Compound\_SC144\_OVCAR-8\_Down

| Name                              | Description                                                                                                                                                                                                                                                                                                                                                                             | Target                                                                                                                                                                                    | Median_score |
|-----------------------------------|-----------------------------------------------------------------------------------------------------------------------------------------------------------------------------------------------------------------------------------------------------------------------------------------------------------------------------------------------------------------------------------------|-------------------------------------------------------------------------------------------------------------------------------------------------------------------------------------------|--------------|
| bisindolylmaleimide               | CDK inhibitor, PKC inhibitor, leucine rich repeat kinase inhibitor                                                                                                                                                                                                                                                                                                                      | CCND1, CDK4, LRRK2, PDPK1, PIM1, PRKCA, PRKCB, PRKCI, PRKCZ, CACNA1C, CACNA1D, CACNA1S, CACNA2D1, CACNA1F, CACNA1H, CACNB2, CALM1, CYP3A5, GLRA1, GLRA3, GLRB, KCNA1, KCNA5, NR1I2, TRPM3 | -98.91       |
| nifedipine                        | calcium channel blocker, L-type calcium channel blocker                                                                                                                                                                                                                                                                                                                                 | PRKCB                                                                                                                                                                                     | -98.78       |
| PKCbeta-inhibitor                 | PKC inhibitor                                                                                                                                                                                                                                                                                                                                                                           |                                                                                                                                                                                           | -97.04       |
| benzo(a)pyrene                    | pro carcinogen that is metabolized to the DNA intercalating agent benzo(a)pyrene diol epoxide                                                                                                                                                                                                                                                                                           |                                                                                                                                                                                           | -95.86       |
| AG-14361                          | PARP inhibitor                                                                                                                                                                                                                                                                                                                                                                          | PARP1                                                                                                                                                                                     | -93.97       |
| RHO-kinase-inhibitor-III[rockout] | ROCK inhibitor                                                                                                                                                                                                                                                                                                                                                                          | IMPDH2, ROCK1                                                                                                                                                                             | -93.82       |
| SB-216763                         | glycogen synthase kinase inhibitor                                                                                                                                                                                                                                                                                                                                                      | GSK3B, CCNA2, CDK2, GSK3A                                                                                                                                                                 | -92.37       |
| PD-169316                         | p38 MAPK inhibitor                                                                                                                                                                                                                                                                                                                                                                      | ALOX5                                                                                                                                                                                     | -91          |
| rucaparib                         | PARP inhibitor                                                                                                                                                                                                                                                                                                                                                                          | PARP1, PARP2                                                                                                                                                                              | -90.31       |
| curcumin                          | cyclooxygenase inhibitor, AP inhibitor, CCN expression inhibitor, DNA methyltransferase inhibitor, EGFR expression inhibitor, free radical scavenger, FtsZ inhibitor, glucose 6 phosphatase inhibitor, histone N-acetyltransferase inhibitor, HIV integrase inhibitor, lipoxygenase inhibitor, NFkB pathway inhibitor, tau aggregation inhibitor, unidentified pharmacological activity | PTGS1, PTGS2, APP, CA1, CA12, CA14, CA2, CA4, CA6, CA9, CCND1, CYP3A4, DNMT1, DNMT3B, EP300, G6PC, MAPT, MMP13, MMP9, NOS2, XDH                                                           | -89.71       |
| kenpaullone                       | CDK inhibitor, glycogen synthase kinase inhibitor, src inhibitor                                                                                                                                                                                                                                                                                                                        | GSK3B, CDK1, CDK5, CCNB1, CDK2, LCK                                                                                                                                                       | -89.69       |
| enzastaurin                       | PKC inhibitor, AKT inhibitor, angiogenesis inhibitor, apoptosis stimulant, PI3K inhibitor                                                                                                                                                                                                                                                                                               | PRKCB, AKT1, GSK3B, PRKCA, PRKCD, PRKCG                                                                                                                                                   | -88.46       |
| OM-137                            | Aurora kinase inhibitor                                                                                                                                                                                                                                                                                                                                                                 |                                                                                                                                                                                           | -85.48       |
| YK-4279                           | apoptosis stimulant, binding of RNA helicase A to the transcription factor EWS-FLI1 inhibitor, EWS-FLI1 inhibitor                                                                                                                                                                                                                                                                       | DHX9, EWSR1, FLI1                                                                                                                                                                         | -85.27       |
| enalaprilat                       | angiotensin converting enzyme inhibitor                                                                                                                                                                                                                                                                                                                                                 | ACE                                                                                                                                                                                       | -85.01       |
| fatostatin                        | sterol regulatory element binding protein (SREBP) inhibitor                                                                                                                                                                                                                                                                                                                             | SREBF1, SREBF2                                                                                                                                                                            | -84.48       |

|            |                                                                                                                      |                                                                                                                              |        |
|------------|----------------------------------------------------------------------------------------------------------------------|------------------------------------------------------------------------------------------------------------------------------|--------|
| SB-218078  | CHK inhibitor, PKC inhibitor                                                                                         | CHEK1                                                                                                                        | -83.88 |
| SB-269970  | serotonin receptor antagonist                                                                                        | HTR7                                                                                                                         | -81.11 |
| indirubin  | CDK inhibitor, glycogen synthase kinase inhibitor, cyclin-dependent kinase inhibitor, PKC inhibitor                  | CDK1, CDK5, CCNE1, CDK2, CDK4, CDK5R1, CDK9, GSK3A, GSK3B, LCK, LRRK1, LRRK2                                                 | -80.55 |
| nifedipine | calcium channel blocker, L-type calcium channel blocker                                                              | CACNA1C, CACNA1D, CACNA1S, CACNA2D1, CACNA1F, CACNA1H, CACNB2, CALM1, CYP3A5, GLRA1, GLRA3, GLRB, KCNA1, KCNA5, NR1I2, TRPM3 | -80.32 |
| etomoxir   | carnitine palmitoyltransferase inhibitor, carnitine O-palmitoyltransferase inhibitor, fatty acid oxidation inhibitor | CPT1A, CPT1B                                                                                                                 | -80.04 |

Table S21. cMap\_Compound\_ciclopirox\_OVCAR-8\_Up

| <b>Name</b>   | <b>Description</b>                                                                                                                                                                                                                                                                                                                                          | <b>Target</b>                                                     | <b>Median_score</b> |
|---------------|-------------------------------------------------------------------------------------------------------------------------------------------------------------------------------------------------------------------------------------------------------------------------------------------------------------------------------------------------------------|-------------------------------------------------------------------|---------------------|
| VU-0418946-1  | hypoxia inducible factor activator                                                                                                                                                                                                                                                                                                                          | HIF1A                                                             | 99.98               |
| SA-1478088    | metalloproteinase inhibitor                                                                                                                                                                                                                                                                                                                                 | MMP12, MMP14, MMP2, MMP8, MMP9                                    | 99.97               |
| TW-37         | BCL inhibitor, MCL1 inhibitor                                                                                                                                                                                                                                                                                                                               | BCL2, BCL2L1, MCL1                                                | 99.97               |
| hinokitiol    | tyrosinase inhibitor                                                                                                                                                                                                                                                                                                                                        | TYR                                                               | 99.97               |
| BRD-K73610817 | apoptosis protein inhibitor                                                                                                                                                                                                                                                                                                                                 |                                                                   | 99.96               |
| VU-0418947-2  | hypoxia inducible factor activator                                                                                                                                                                                                                                                                                                                          |                                                                   | 99.96               |
| PAC-1         | caspase activator                                                                                                                                                                                                                                                                                                                                           | CASP3                                                             | 99.94               |
| MST-312       | telomerase inhibitor                                                                                                                                                                                                                                                                                                                                        | TERT                                                              | 99.94               |
| PAC-1         | caspase activator                                                                                                                                                                                                                                                                                                                                           | CASP3                                                             | 99.93               |
| WAY-170523    | metalloproteinase inhibitor                                                                                                                                                                                                                                                                                                                                 | MMP13                                                             | 99.92               |
| BAPTA-AM      | potassium channel blocker                                                                                                                                                                                                                                                                                                                                   | KCNA3, KCNA5, KCNH2                                               | 99.88               |
| UK-356618     | metalloproteinase inhibitor                                                                                                                                                                                                                                                                                                                                 | MMP3, MMP13, MMP14, MMP2, MMP9                                    | 99.74               |
| AG-592        | tyrosine kinase inhibitor                                                                                                                                                                                                                                                                                                                                   |                                                                   | 99.69               |
| MLN-4924      | nedd activating enzyme inhibitor                                                                                                                                                                                                                                                                                                                            | NAE1, UBA3                                                        | 99.41               |
| BRD-A54632525 | lipoxygenase inhibitor                                                                                                                                                                                                                                                                                                                                      | ALOX12                                                            | 99.26               |
| NSC-632839    | ubiquitin hydrolase inhibitor, ubiquitin isopeptidase inhibitor                                                                                                                                                                                                                                                                                             | USP2, USP7, SENP2, USP1                                           | 99.21               |
| NSC-3852      | HDAC inhibitor                                                                                                                                                                                                                                                                                                                                              | HDAC1                                                             | 99.08               |
| linifanib     | PDGFR tyrosine kinase receptor inhibitor, VEGFR inhibitor, angiogenesis inhibitor, colony stimulating factor receptor antagonist, colony stimulating factor receptor inhibitor, FLT3 inhibitor, macrophage colony stimulating factor antagonist, MAP kinase inhibitor, PARP inhibitor, receptor tyrosine kinase inhibitor, STAT inhibitor, VEGFR antagonist | CSF1R, KDR, PDGFRB, FLT1, FLT3, FLT4, CSF1, KIT, PDGFRA, RET, TEK | 98.89               |

|                 |                                                                                                                                             |                                                                                                 |       |
|-----------------|---------------------------------------------------------------------------------------------------------------------------------------------|-------------------------------------------------------------------------------------------------|-------|
| BX-912          | AKT inhibitor, phosphoinositide dependent kinase inhibitor, pyruvate dehydrogenase kinase inhibitor                                         | PDPK1, AKT2, CDK2, CHEK1, GSK3B, KDR, PDK1                                                      | 98.85 |
| gossypol        | BCL inhibitor, MCL1 inhibitor, 11-beta hydroxysteroid dehydrogenase inhibitor, growth factor receptor modulator, lipid peroxidase inhibitor | BCL2, BCL2L1, MCL1, BCL2L2, CTGF, EGF                                                           | 98.74 |
| BIX-01294       | DNA methyltransferase inhibitor, histone lysine methyltransferase inhibitor, histone lysine methyltransferase inhibitor                     | EHMT1, EHMT2                                                                                    | 98.72 |
| NSC-632839      | ubiquitin hydrolase inhibitor, ubiquitin isopeptidase inhibitor                                                                             | USP2, USP7, SENP2, USP1                                                                         | 98.57 |
| disulfiram      | aldehyde dehydrogenase inhibitor, DNA methyltransferase inhibitor, TRPA1 agonist                                                            | ALDH2, ALDH1A2, ALDH5A1, ALDH7A1, CYP2E1, DBH, DNMT1, TRPA1                                     | 98.52 |
| BMY-45778       | IP1 prostacyclin receptor agonist                                                                                                           | PTGIR                                                                                           | 98.5  |
| heliomycin      | antibiotic, bacterial RNA synthesis inhibitor                                                                                               |                                                                                                 | 98.49 |
| chloroxine      | opioid receptor inhibitor                                                                                                                   | OPRK1                                                                                           | 98.43 |
| thiostrepton    | downregulates FOXM1 expression, FOXM1 expression inhibitor, protein synthesis inhibitor                                                     | FOXM1                                                                                           | 98.23 |
| puromycin       | adenosine receptor agonist, protein synthesis inhibitor                                                                                     | NHP2L1, RPL10L, RPL11, RPL13A, RPL15, RPL19, RPL23, RPL23A, RPL26L1, RPL3, RPL37, RPL8, RSL24D1 | 98.02 |
| APHA-compound-8 | HDAC inhibitor                                                                                                                              | HDAC8                                                                                           | 98    |

Table S22. cMap\_Compound\_ciclopirox\_OVCAR-8\_Down

| Name                              | Description                                                                                                                     | Target                                                                            | Median_score |
|-----------------------------------|---------------------------------------------------------------------------------------------------------------------------------|-----------------------------------------------------------------------------------|--------------|
| SB-216763                         | glycogen synthase kinase inhibitor                                                                                              | GSK3B, CCNA2, CDK2, GSK3A                                                         | -99.26       |
| PKCbeta-inhibitor                 | PKC inhibitor                                                                                                                   | PRKCB                                                                             | -97.35       |
| YK-4279                           | apoptosis stimulant, binding of RNA helicase A to the transcription factor EWS-FLI1 inhibitor, EWS-FLI1 inhibitor               | DHX9, EWSR1, FLI1                                                                 | -96.56       |
| PD-169316                         | p38 MAPK inhibitor                                                                                                              | ALOX5                                                                             | -95.9        |
| benzo(a)pyrene                    | pro carcinogen that is metabolized to the DNA intercalating agent benzo(a)pyrene diol epoxide                                   |                                                                                   | -95.36       |
| RHO-kinase-inhibitor-III[rockout] | ROCK inhibitor                                                                                                                  | IMPDH2, ROCK1                                                                     | -94.83       |
| rucaparib                         | PARP inhibitor                                                                                                                  | PARP1, PARP2                                                                      | -94.51       |
| SB-218078                         | CHK inhibitor, PKC inhibitor                                                                                                    | CHEK1                                                                             | -93.35       |
| bisindolylmaleimide               | CDK inhibitor, PKC inhibitor, leucine rich repeat kinase inhibitor                                                              | CCND1, CDK4, LRRK2, PDPK1, PIM1, PRKCA, PRKCB, PRKCI, PRKCZ                       | -92.95       |
| epothilone                        | inhibition of microtubulefunction, microtubule stabilizing agent, microtubule stimulant, tubulin inhibitor                      | TUBA1A, TUBA1B, TUBA1C, TUBA3C, TUBA4A, TUBA8, TUBB, TUBB1, TUBB3, TUBB4A, TUBB4B | -91.39       |
| ABT-751                           | tubulin inhibitor, dihydropteroate synthase inhibitor, microtubule inhibitor, PABA antagonist, tubulin polymerisation inhibitor | TUBB                                                                              | -91.01       |

Table S23. cMap\_Compound\_SC144\_LN CaP\_Up

| <b>Name</b>        | <b>Description</b>                                                                                                                          | <b>Target</b>                                   | <b>Median_score</b> |
|--------------------|---------------------------------------------------------------------------------------------------------------------------------------------|-------------------------------------------------|---------------------|
| hinokitiol         | tyrosinase inhibitor                                                                                                                        | TYR                                             | 99.94               |
| PAC-1              | caspase activator                                                                                                                           | CASP3                                           | 99.94               |
| TW-37              | BCL inhibitor, MCL1 inhibitor                                                                                                               | BCL2, BCL2L1, MCL1                              | 99.94               |
| VU-0418947-2       | hypoxia inducible factor activator                                                                                                          |                                                 | 99.93               |
| VU-0418946-1       | hypoxia inducible factor activator                                                                                                          | HIF1A                                           | 99.93               |
| SA-1478088         | metalloproteinase inhibitor                                                                                                                 | MMP12, MMP14, MMP2, MMP8, MMP9                  | 99.91               |
| PAC-1              | caspase activator                                                                                                                           | CASP3                                           | 99.91               |
| BRD-K73610817      | apoptosis protein inhibitor                                                                                                                 |                                                 | 99.87               |
| MST-312            | telomerase inhibitor                                                                                                                        | TERT                                            | 99.74               |
| UK-356618          | metalloproteinase inhibitor                                                                                                                 | MMP3, MMP13, MMP14, MMP2, MMP9                  | 99.29               |
| ingenol            | PKC activator                                                                                                                               | PRKCD, PRKCE                                    | 97.69               |
| prostratin         | NFkB pathway activator, PKC activator                                                                                                       | PRKCA, PRKCB, PRKCD, PRKCE, PRKCG, PRKCH, PRKCQ | 97.57               |
| rhodomyrtoxin      | cytotoxic, DNA intercalator                                                                                                                 |                                                 | 97.48               |
| WAY-170523         | metalloproteinase inhibitor                                                                                                                 | MMP13                                           | 95.82               |
| gossypol           | BCL inhibitor, MCL1 inhibitor, 11-beta hydroxysteroid dehydrogenase inhibitor, growth factor receptor modulator, lipid peroxidase inhibitor | BCL2, BCL2L1, MCL1, BCL2L2, CTGF, EGF           | 95.58               |
| BIX-01294          | DNA methyltransferase inhibitor, histone lysine methyltransferase inhibitor                                                                 | EHMT1, EHMT2                                    | 95.41               |
| rhodomyrtoxin-b    | cytotoxic, DNA intercalator                                                                                                                 |                                                 | 94.76               |
| AG-592             | tyrosine kinase inhibitor                                                                                                                   |                                                 | 94.6                |
| embelin            | HCV inhibitor, XIAP inhibitor                                                                                                               | XIAP                                            | 94.08               |
| lasalocid          | ionophore antibiotic                                                                                                                        |                                                 | 94                  |
| YM-155             | survivin inhibitor, XIAP expression inhibitor                                                                                               | BIRC5                                           | 93.55               |
| L-690488           | inositol monophosphatase inhibitor                                                                                                          | IMPA1                                           | 93.38               |
| tyrphostin-AG-1478 | EGFR inhibitor                                                                                                                              | EGFR, MAPK14                                    | 93.02               |
| QW-BI-011          | histone lysine methyltransferase inhibitor                                                                                                  | EHMT2                                           | 92.7                |
| JTC-801            | opioid receptor antagonist                                                                                                                  | OPRL1                                           | 92.21               |



Table S24. cMap\_Compound\_SC144\_LN CaP\_Down

| Name                | Description                                                                                                                              | Target                                                                          | Median_score |
|---------------------|------------------------------------------------------------------------------------------------------------------------------------------|---------------------------------------------------------------------------------|--------------|
| benzo(a)pyrene      | pro carcinogen that is metabolized to the DNA intercalating agent benzo(a)pyrene diol epoxide                                            |                                                                                 | -98.98       |
| PPP2R5B             | Serine/threonine phosphatases / Protein phosphatase 2, regulatory subunits, protein phosphatase 2, regulatory subunit B', beta           |                                                                                 | -96.23       |
| TEX10               | testis expressed 10                                                                                                                      |                                                                                 | -88.57       |
| troglitazone        | PPAR receptor agonist, insulin sensitizer, CCK ligand expression inhibitor, EGR1 expression enhancer, glycogen synthase kinase stimulant | PPARG, ACSL4, AKR1B1, CCL2, CYP3A4, ESRRR, ESRRG, INS, SERPINE1, SLC29A1, TRPM3 | -87.06       |
| GNB2                | WD repeat domain containing, guanine nucleotide binding protein (G protein), beta polypeptide 2                                          |                                                                                 | -87.02       |
| TRAF4               | RING-type (C3HC4) zinc fingers, TNF receptor-associated factor 4                                                                         |                                                                                 | -86.87       |
| CASP4               | Caspases, caspase 4, apoptosis-related cysteine peptidase                                                                                |                                                                                 | -86.4        |
| PP-2                | src inhibitor                                                                                                                            | SRC, LCK, ABL1, LYN, RIPK2                                                      | -85.03       |
| ZG-10               | JNK inhibitor                                                                                                                            | MAPK8                                                                           | -84.81       |
| PRKCQ               | Delta subfamily, protein kinase C, theta                                                                                                 |                                                                                 | -84.67       |
| bisindolylmaleimide | CDK inhibitor, PKC inhibitor, leucine rich repeat kinase inhibitor                                                                       | CCND1, CDK4, LRRK2, PDPK1, PIM1, PRKCA, PRKCB, PRKCI, PRKCZ                     | -84.57       |
| diethylstilbestrol  | estrogen receptor agonist, chloride channel blocker                                                                                      | ESR1, ESR2, ESRRG, ESRRB                                                        | -84.49       |
| CPD                 | Carboxypeptidase A, carboxypeptidase D                                                                                                   |                                                                                 | -84.15       |
| INHBE               | inhibin, beta E                                                                                                                          |                                                                                 | -83.83       |
| SOS1                | Rho guanine nucleotide exchange factors, son of sevenless homolog 1 (Drosophila)                                                         |                                                                                 | -83.65       |
| TWS-119             | glycogen synthase kinase inhibitor                                                                                                       | GSK3B, JUN, MYC                                                                 | -82.72       |
| PHTF2               | putative homeodomain transcription factor 2                                                                                              |                                                                                 | -82.67       |
| ALAS1               | aminolevulinate, delta-, synthase 1                                                                                                      |                                                                                 | -82.16       |
| MYO10               | Pleckstrin homology (PH) domain containing, myosin X                                                                                     |                                                                                 | -82.02       |
| FXVD2               | Ion transport regulator, FXVD domain containing ion transport regulator 2                                                                |                                                                                 | -81.81       |
| SGCB                | sarcoglycan, beta (43kDa dystrophin-associated glycoprotein)                                                                             |                                                                                 | -81.79       |
| dephostatin         | tyrosine phosphatase inhibitor                                                                                                           | PTPN1, PTPN6                                                                    | -81.76       |
| bicuculline         | GABA receptor antagonist                                                                                                                 | GABRA1, GABRA2, GABRA3, GABRA4, GABRA5, GABRA6, KCNN1                           | -81.37       |

---

|         |                                                                                                |        |
|---------|------------------------------------------------------------------------------------------------|--------|
| MLEC    | malectin                                                                                       | -81.36 |
| HERPUD1 | homocysteine-inducible, endoplasmic reticulum stress-inducible, ubiquitin-like domain member 1 | -80.65 |

---
